# Expectancy-based rhythmic entrainment as continuous Bayesian inference

Jonathan Cannon

March 5, 2021

Department of Brain and Cognitive Science, Massachusetts Institute of Technology, Cambridge, MA, USA

Tel.: +314-749-6902

[jean@mit.edu](mailto:jean@mit.edu)

## Abstract

When presented with complex rhythmic auditory stimuli, humans are able to track underlying temporal structure (e.g., a “beat”), both covertly and with their movements. This capacity goes far beyond that of a simple entrained oscillator, drawing on contextual and enculturated timing expectations and adjusting rapidly to perturbations in event timing, phase, and tempo. Previous modeling work has described how entrainment to rhythms may be shaped by event timing expectations, but sheds little light on any underlying computational principles that could unify the phenomenon of expectation-based entrainment with other brain processes. Inspired by the predictive processing framework, we propose that the problem of rhythm tracking is naturally characterized as a problem of continuously estimating an underlying phase and tempo based on precise event times and their correspondence to timing expectations. We present two inference problems formalizing this insight: PIPPET (Phase Inference from Point Process Event Timing) and PATIPPET (Phase and Tempo Inference). Variational solutions to these inference problems resemble previous “Dynamic Attending” models of perceptual entrainment, but introduce new terms representing the dynamics of uncertainty and the influence of expectations in the absence of sensory events. These terms allow us to model multiple characteristics of covert and motor human rhythm tracking not addressed by other models, including sensitivity of error corrections to inter-event interval and perceived tempo changes induced by event omissions. We show that positing these novel influences in human entrainment yields a range of testable behavioral predictions. Guided by recent neurophysiological observations, we attempt to align the phase inference framework with a specific brain implementation. We also explore the potential of this normative framework to guide the

28 interpretation of experimental data and serve as building blocks for even richer predictive processing and  
29 active inference models of timing.

30 Keywords: Bayesian Inference, Active Inference, Timing, Rhythm, Entrainment

## 31 **1 Introduction**

32 The human brain is remarkably proficient at identifying and exploiting temporal structure in its environment,  
33 especially in the auditory domain. This phenomenon is most easily observed in the case of auditory stimuli  
34 with underlying periodicity: humans adeptly and often spontaneously synchronize their movements with such  
35 auditory rhythms [1], and human brain activity in auditory and motor regions aligns to auditory stimulus  
36 periodicity even in the absence of movement [2]. Both of these phenomena are cases of “entrainment”  
37 (sensorimotor and neural, respectively), where we define “entrainment” as in [3]: the temporal alignment of  
38 a biological or behavioral process with the regularities in an exogenously occurring stimulus.

39 A simple sinusoidal phase oscillator can entrain to a periodic stimulus; however, it is difficult to discuss the  
40 flexible entrainment of human behavior and cognitive processes to variable and sometimes aperiodic patterns  
41 such as speech without invoking the cognitive concept of “temporal expectation.” Expectations for event  
42 timing can be used to achieve a range of behavioral goals. They can help us hone our sensory detection, our  
43 sensory discrimination, and our response time for behaviorally important stimuli at the anticipated time [4,  
44 5, 6]. In some situations, temporal expectations attenuate neural responses [7], which may help to conserve  
45 neural resources. And timing expectations bias our perception of time, allowing us to use prior experience  
46 to supplement noisy sensory data as we make temporal judgments [8].

47 Entrainment in humans involves an interplay of stimulus and temporal expectation [9]. Nowhere is  
48 this clearer than in interaction with music, humankind’s playground for auditory temporal expectation and  
49 entrainment [10]. But the precise nature of this interplay is an open question. The framework of Dynamic  
50 Attending Theory characterizes temporal expectancy as pulses of “attentional energy” issued by entrained  
51 neural oscillators, and mathematical models based on these ideas describe bidirectional interactions between  
52 temporal expectation and entrainment that reproduce aspects of human behavior and perception [11, 12]. But  
53 although the behavior of these models may be satisfying in certain applications, the groundwork underlying  
54 them is less so: key high-level concepts like the “attentional pulse” are difficult to define mechanistically or  
55 computationally, so the implementations of these concepts in models remain impressionistic.

56 An alternative approach to modeling the role of expectations in the brain is the “predictive processing”  
57 framework [13]. This framework posits that the brain engages in a continuous process of inferring the hidden  
58 causes of sensory events based on a learned understanding of how those causes produce sensation. Unlike the

59 terms in Dynamic Attending Theory models, the terms in predictive processing models are directly linked  
60 to the formal inference problem being solved: the solution to the problem demands that certain quantities  
61 be computed, giving us reason to expect to find those quantities represented in the brain. In particular,  
62 “precision” or certainty plays a key role, determining how new sensory information is weighted relative to  
63 existing beliefs about the hidden causes.

64 Here, we apply the predictive processing approach to the process of expectancy-based entrainment by  
65 formalizing it as an inference problem: namely, the problem of inferring the state of the exogenous process  
66 giving rise to a series of events in time. We use the mathematical tool of point processes to formulate a  
67 model of precise event timing. We derive an optimal solution to the inference problem, which we hypothesize  
68 corresponds with the brain’s mechanisms for entrainment. The resulting models resemble Dynamic Attending  
69 Theory models, but introduce two key novel elements:

- 70 1. Dynamically estimated phase uncertainty moderates the balance between top-down and bottom-up  
71 influences on estimated phase.
- 72 2. Event expectations influence estimated phase *even in the absence of actual events*.

73 These elements allow them to reproduce aspects of human entrainment unaddressed by existing models,  
74 including:

- 75 1. Failure to track phase through excessive syncopation (events occurring at weakly expected times but  
76 omitted at strongly expected times).
- 77 2. Illusory contraction of intervals when expected events are omitted.
- 78 3. Near-linear corrections to phase after event timing perturbations, with larger (and even over-) correc-  
79 tions for stimulus trains with longer inter-onset intervals.

80 They are also significantly more flexible than Dynamic Attending Theory models in their descriptive  
81 power, allowing us to describe entrainment based on either periodic or aperiodic expectation patterns, and,  
82 as predictive processing models, they recast entrainment in a formal language that links it a the wide range  
83 of other cognitive phenomena.

84 In the next section, we formulate three versions of the problem of expectancy-based entrainment that are  
85 amenable to precise solutions, which we refer to collectively as the “phase inference framework.” In the first,  
86 “Phase Inference from Point Process Event Timing” (PIPET), a hidden phase variable advances steadily  
87 with added noise, and the observer is tasked with continuously inferring the phase based on the observation  
88 of events emitted probabilistically at certain phases with certain degrees of precision. In the second version,

89 “Phase And Tempo Inference from Point Process Event Timing” (PATIPPET), the rate of phase advance  
90 (tempo) is also a dynamic variable with drift, and the solution simultaneously estimates phase, tempo, and  
91 certainty about both. The third version (mPIPPET) generalizes the first two to incorporate the observation  
92 of multiple types of events, each with distinct characteristic phases and precisions, into the inference process.  
93 We present variational filtering equations that approximate perfect Bayesian solutions to these problems.

94 In the Results section, we simulate these filters, drawing on music as a rich source of intuitive examples  
95 of entrainment informed by expectation. In doing so, we provide intuition into the range of behaviors of  
96 these solutions, and show how novel features introduced by the normative framework reproduce key aspects  
97 of human entrainment behavior that are not explained by other models. In the Discussion, we discuss the  
98 potential contributions of PIPPET and PATIPPET to the analysis of experimental data, to richer and more  
99 detailed models, and to our understanding of entrainment in the brain.

## 100 **2 Mathematical framework**

101 Predictive processing should be a natural modeling framework for understanding rhythmic expectation and  
102 entrainment [14, 15, 16]. However, existing predictive coding models that operate in continuous time are  
103 structured to perform inference based on continuous observation, characterizing prediction errors in terms  
104 of deviation between a true level of input and a mean expected level [17, 18]. In other words, they describe  
105 predictions about “what” rather than “when.” They are therefore ill-suited to characterizing moment-by-  
106 moment errors in *timing* prediction, which are made sporadically and separated by intervals mostly devoid  
107 of informative prediction error. This may be a fundamental shortcoming in modeling inference in the brain:  
108 behavior and neurophysiology suggests that information about “when” is carried by its own distinctive  
109 pathways and represented separately from “what,” both in perceptual and motor tasks [19, 6, 10]. Bayesian  
110 methods have been applied to describe inferences about timing in the brain [20, 21, 22], but in these cases  
111 the problem the brain solves has been formulated as discrete inferences about consecutive intervals rather  
112 than a continuous inference process.

113 Here, we use event timing to inform a continuous variational inference process by first creating a generative  
114 model describing the probabilistic generation of precisely timed events and then variationally inverting that  
115 model. To model event generation, we use the mathematical tool of point processes.

### 116 **2.1 Phase Inference from Point Process Event Timing (PIPPET)**

117 PIPPET is the problem of dynamically estimating a hidden noisy phase variable based on the timing of  
118 events generated as a point process whose rate is modulated as a specific function of phase. The generative

119 model consists of a phase  $\phi \in \mathbb{R}$  that advances as a drift-diffusion process:

$$d\phi = dt + \sigma dW_t \quad (1)$$

120 and an inhomogeneous point process that generates events with probability  $\lambda(\phi)$ . This function is known to  
121 the observer. We will refer to  $\lambda(\phi)$  as an “expectation template” because it describes the temporal structure  
122 of the observer’s event expectations, though it can also be understood as a hazard rate for events. To achieve  
123 both analytical tractability and flexible descriptive power, we assume that  $\lambda(\phi)$  is a sum of a constant  $\lambda_0$   
124 and a set of scaled Gaussian peaks indexed by  $i = 1, 2, \dots$  etc. Each Gaussian peak  $i$  is centered at a mean  
125 phase  $\phi_i$  with variance  $v_i$  and scale  $\lambda_i$ :

$$\lambda(\phi) = \lambda_0 + \sum_i \lambda_i \varphi(\phi | \phi_i, v_i) \quad (2)$$

126 where  $\varphi(\cdot | m, v)$  denotes the pdf of a Gaussian distribution with mean  $m$  and variance  $v$ .

- 127 • Each Gaussian mean  $\phi_i$  represents a phase at which an event is expected;
- 128 •  $\lambda_i$  represents the strength of that expectation;
- 129 • and  $v_i^{-1}$  is the temporal precision of that expectation.
- 130 •  $\lambda_0 > 0$  represents the rate of events being generated as part of a uniform noise background unrelated  
131 to phase.

132 The point process with rate described by (2) can be understood as a sum of independent point processes  $i$ ,  
133 one for each expectation peak and one for the uniform background process with rate  $\lambda_0$ , whose events are  
134 indistinguishable. The mathematics of updating a phase estimate at an event can be understood to involve  
135 a causal inference on which of these processes caused each event.

136  $\lambda(\phi)dt$  is the likelihood function over  $\phi$  associated with the occurrence of an event, so  $\lambda(\phi)$  is a rescaled  
137 likelihood function. See Figure 1A for illustration.

138 Note that  $\phi$  is assumed to be on the real line, not the circle. This design decision allows PIPPET to  
139 entrain to temporally patterned expectations with or without periodic structure by choosing a periodic or  
140 aperiodic expectation template  $\lambda$ .

141 Given a series of event times  $\{t_n\}$  tallied by an event-counting function  $N_t : \mathbb{R} \rightarrow \mathbb{Z}^{0+}$ , an expectation  
142 template  $\lambda(\phi)$ , and a prior distribution  $p_0(\phi)$  describing the distribution of phase at time  $t = 0$ , the observer’s  
143 goal is to infer a posterior distribution  $p_t(\phi) = p(\phi | N_{\tau < t})$  describing an estimate of phase  $\phi$  at any time  $t$   
144 based on the event history up to  $t$ .

145 In [23], Snyder derives an exact PDE for the evolution of this posterior distribution over time. Following  
 146 the predictive processing ansatz of maintaining Gaussian posterior distributions (the Laplace assumption),  
 147 which provides both computational tractability and neurophysiological plausibility by reducing the repre-  
 148 sentation of the posterior to a mean and a variance, we project the posterior onto a Gaussian at each  $dt$   
 149 time-step. We do this by moment-matching: we use Snyder's solution to determine the evolution of the mean  
 150 and variance of the posterior, and then replace the true posterior with a Gaussian with the same mean and  
 151 variance. This choice of Gaussian is the choice with minimum KL divergence from the true posterior [24],  
 152 and therefore also minimizes the free energy of the solution within the family of possible Gaussian posteriors  
 153 in accordance with the Free Energy Principle [25].

154 The result of this derivation is a generalization of a Kalman-Bucy filter with Poisson observation noise.  
 155 Eden and Brown [26] have derived an explicit form for this filter, but it relies on a local approximation of  
 156 the rate function  $\lambda$  that hides some of the interesting effects of events expected at nearby time points. For  
 157  $\lambda$  a mixture of Gaussians, we derive a filter directly from Snyder's solution in [23] that more accurately  
 158 approximates the optimal (Bayesian) solution. The derivation is presented in Appendix 6.2.

159 **Solution: the PIPPET filter** At any time  $t$ , let  $\mu_t$  denote the mean and  $V_t$  denote the variance of the  
 160 Gaussian posterior. At each event time  $t$ , we let  $\mu_t$  and  $V_t$  equal the left-hand limits of  $\mu$  and  $V$  before  
 161 the event, and we write  $\mu_{t+}$  and  $V_{t+}$  to denote their right-hand limit values after the event ( $\mu$  and  $V$  are  
 162 left-continuous). Let  $dN_t$  denote the increment in the event-counting process at time  $t$ , which is either 0 or  
 163 1 with probability one.  $\mu_t$  and  $V_t$  evolve according to the stochastic differential equation:

$$\begin{cases} d\mu = & dt + (\hat{\mu} - \mu)(dN_t - \Lambda dt) \\ dV = & \sigma^2 dt + (\hat{V} - V)(dN_t - \Lambda dt) \end{cases} \quad (3)$$

or, equivalently, they evolve between events according to the ODE:  $\begin{cases} \dot{\mu} = & 1 - \Lambda(\hat{\mu} - \mu) \\ \dot{V} = & \sigma^2 - \Lambda(\hat{V} - V) \end{cases}$  and reset at  
 each event to  $\mu_{t+} = \hat{\mu}$  and  $V_{t+} = \hat{V}$ , where we define

$$\begin{aligned} \hat{\mu} &:= \frac{\lambda_0}{\Lambda} \mu_t + \sum_{i=1, \dots} \frac{\Lambda_i}{\Lambda} \hat{\mu}_i \\ \hat{V} &:= \frac{\lambda_0}{\Lambda} (V_t + (\mu_t - \mu_{t+})^2) + \sum_{i=1, \dots} \frac{\Lambda_i}{\Lambda} (\hat{V}_i + (\hat{\mu}_i - \mu_{t+})^2) \end{aligned}$$

(Note that in this formulation,  $\mu_{t+}$  must be calculated before  $V_{t+}$ .)

$$\hat{\mu}_i := \frac{V_t^{-1}\mu_t + v_i^{-1}\phi_i}{V_t^{-1} + v_i^{-1}} \quad \text{and} \quad \hat{V}_i := \frac{1}{V_t^{-1} + v_i^{-1}}$$

$$\Lambda_i := \lambda_i \varphi(\mu_t | \phi_i, v_i + V_t) \quad \text{and} \quad \Lambda := \sum_i \Lambda_i$$

164 These terms are illustrated in Figure 1. Intuitively,

- 165 •  $\Lambda$  (implicitly a function of  $\mu_t$  and  $V_t$ ) is the degree to which an event is anticipated at  $t$  while taking  
166 into account uncertainty about underlying phase, also known as the “subjective hazard rate”.  $\Lambda_i$  is  
167 the degree to which an event is anticipated from peak  $i$  (the “conditional subjective hazard rate”).
- 168 • At each event time  $t$ ,  $\lambda(\phi)$  serves as a (rescaled) likelihood function for phase, and the role of prior  
169 is played by the phase distribution  $p_t$ , a Gaussian with mean  $\mu_t$  and variance  $V_t$ . Each peak  $i$  of  $\lambda$  is  
170 a possible “cause” of the event, as is the background event rate  $\lambda_0$ . Each peak is associated with a  
171 “candidate posterior” with mean  $\hat{\mu}_i$  and variance  $\hat{V}_i$  – this would be the posterior on phase if the event  
172 were known to be caused by peak  $i$ .  $\hat{\mu}_i$  is a weighted sum of the current mean estimated phase  $\mu_t$  and  
173 the center  $\phi_i$  of expectation peak  $i$ , weighted by their respective precisions. Note that, following the  
174 predictive processing ansatz, this is the phase that minimizes precision-weighted prediction error with  
175 respect to predicted event timing and predicted phase.
- 176 • At an event, the phase distribution resets to a Gaussian with mean  $\hat{\mu}$  and variance  $\hat{V}$ . These are  
177 weighted sums of the influences of each candidate posterior, each weighted by conditional subjective  
178 hazard rate  $\Lambda_i$ . The expression for  $\hat{V}$  contains additional terms  $(\hat{\mu}_i - \mu_{t+})^2$  and  $(\mu_t - \mu_{t+})^2$ , which  
179 cause the variance of the posterior to increase if the cause of the event is ambiguous.
- 180 • The background rate  $\lambda_0$  acts as an alternative possible cause for any event. It serves to weight the  
181 posterior phase distribution toward the prior distribution before the event, and gives rise to causal  
182 ambiguity for any event and a resulting increase in posterior variance.
- 183 • Between events, each  $dt$  time step is taken as a Bayesian inference with likelihood  $1 - \lambda(\phi)dt$  and with  
184 a Gaussian prior consisting of the posterior of the previous time step carried forward by  $dt$  according to  
185 the Fokker-Planck evolution associated with equation (1). This prior causes  $\mu_t$  to increase steadily and  
186  $V_t$  to grow at rate  $\sigma^2$ . The likelihood pushes  $\mu$  and  $V$  away from  $\hat{\mu}$  and  $\hat{V}$  with a strength proportionate  
187 to subjective hazard rate  $\Lambda$ . Thus, the absence of an event continuously pushes the posterior in the  
188 opposite direction as would the occurrence of an event.

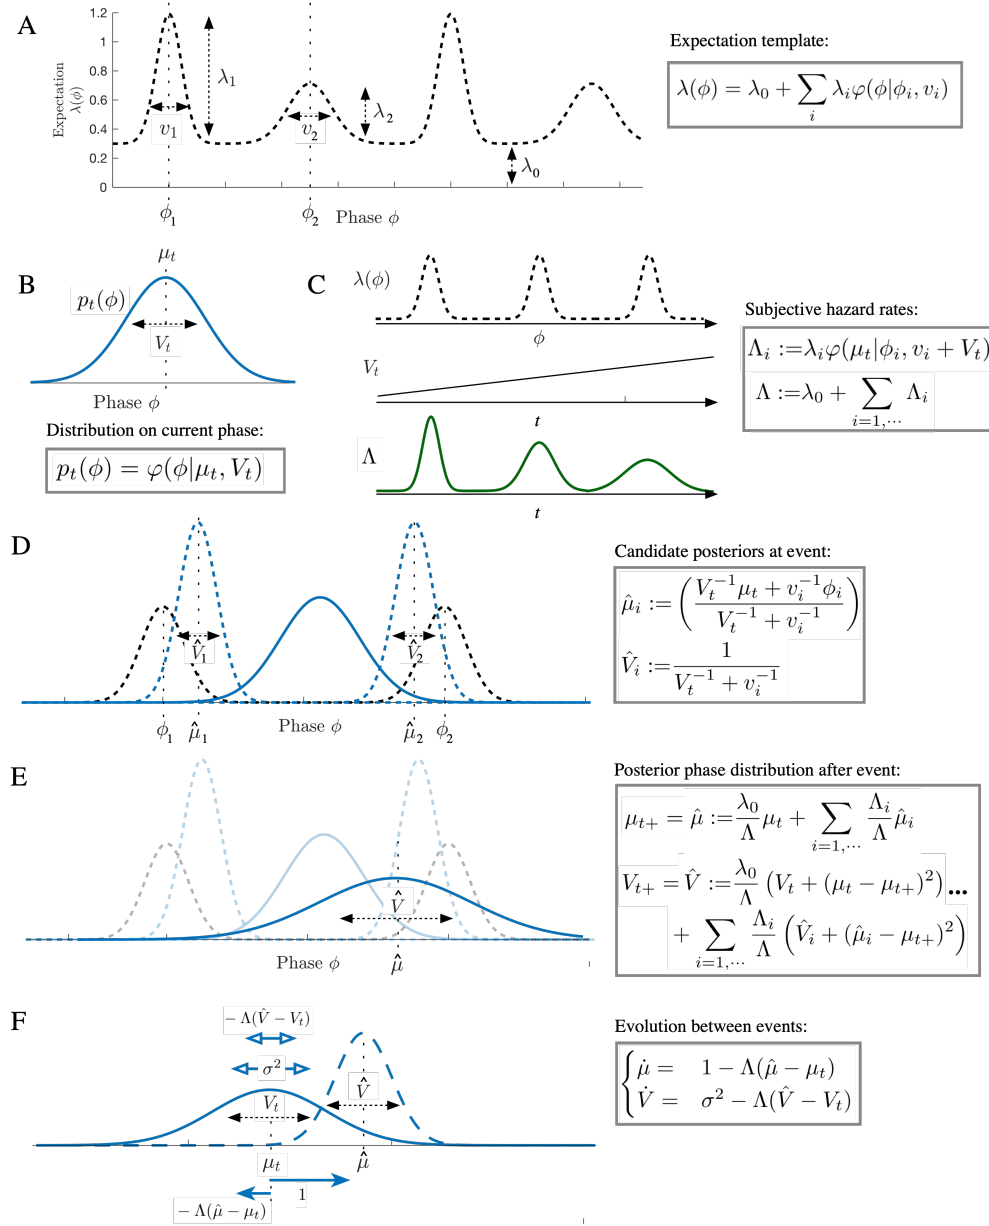

**Figure 1: Illustration of the PIPPET filter.** A) In the PIPPET generative model,  $\lambda(\phi)$  represents the instantaneous rate of events occurring when the underlying temporal process is at phase  $\phi$ . This is assumed to be a sum of Gaussian-shaped functions with means  $\phi_i$  representing the phases at which specific events are expected, variances  $v_i$  representing (the inverse of) the temporal precision of the expectations, and scales  $\lambda_i$  representing the strength of the expectations. A constant  $\lambda_0$  is also added, representing the instantaneous rate of events unrelated to phase. B) At any time  $t$ , the filter’s estimate of current phase  $p_t(\phi)$  is forced to be a Gaussian with mean  $\mu_t$  (the estimated phase at time  $t$ ) and variance  $V_t$  (the level of uncertainty about the phase estimate). D) These allow us to define a subjective hazard rate  $\Lambda$  (implicitly a function of time) representing the degree to which an event is anticipated at  $t$ , and conditional subjective hazard rates  $\Lambda_i$  representing the degree to which an event is anticipated from peak  $i$ . These hazard rates become less precise as phase uncertainty  $V_t$  increases. D) Each peak  $i$  of  $\lambda$  is associated with a “candidate posterior” with mean  $\hat{\mu}_i$  and variance  $\hat{V}_i$  – this would be the posterior on phase if the event were known to come from peak  $i$ . E) At an event, the phase distribution resets to a Gaussian with mean  $\hat{\mu}$  and variance  $\hat{V}$ . These incorporate the influences of each candidate posterior, and  $\hat{V}$  can increase if the cause of the event is ambiguous (as dramatically illustrated above). F) Between events,  $\mu_t$  increases at rate 1 and  $V_t$  grows at rate  $\sigma^2$ . Additionally,  $\mu$  and  $V$  are pushed away from  $\hat{\mu}$  and  $\hat{V}$  with a strength proportionate to subjective hazard rate  $\Lambda$ .



## 189 2.2 Phase And Tempo Inference from Point Process Event Timing (PATIP- 190 PET)

191 PATIPPET extends PIPPET by making the rate of phase advancement itself a noisy dynamic variable  
192 subject to ongoing inference. The dynamic state of the system is now a two-dimensional vector  $\mathbf{x} = \begin{pmatrix} \phi \\ \theta \end{pmatrix}$ ,  
193 where  $\phi$  is the phase as above,  $\theta$  is the rate of phase advancement (or tempo), and  $\sigma$  and  $\sigma_\theta$  are the levels  
194 of phase and tempo noise, respectively:

$$d\mathbf{x} = \begin{pmatrix} \theta \\ 0 \end{pmatrix} dt + \begin{pmatrix} \sigma dW_t \\ \sigma_\theta dW_t^\theta \end{pmatrix} \quad (4)$$

195 As above, an inhomogeneous point process generates events with probability based on an expectation tem-  
196 plate  $\lambda$ , which in this case is a function of both phase  $\phi$  and tempo  $\theta$ . In this formulation, we want events  
197 to occur with a certain probability in each  $d\phi$  phase bin regardless of tempo, which we can accomplish by  
198 scaling the event rate by  $\theta$ :

$$\lambda(\phi, \theta) = \theta \left( \lambda_0 + \sum_i \lambda_i \varphi(\phi | \phi_i, v_i) \right) \quad (5)$$

199 Note that this is the same as the PIPPET expression for event rate if we set  $\theta = 1$ .

200 As before, the observer's goal is to infer a posterior distribution at any time  $t$  using preceding event times;  
201 now the distribution  $p_t(\mathbf{x})$  describes an estimate of both phase and tempo. A similar derivation provides  
202 a point-process Kalman-Bucy filter that optimally serves this function within the constraint of Gaussian  
203 posteriors, providing a running estimate of a mean phase and tempo  $\boldsymbol{\mu}_t$  and a phase/tempo covariance  
204 matrix  $\mathbf{V}_t$ . The solution is presented in 6.1 and its derivation is presented in 6.2.

205 The resulting PATIPPET filter generalizes the PIPPET filter, and is identical if the initial tempo distri-  
206 bution is set to a delta distribution at  $\theta = 1$  and  $\sigma_\theta$  is set to zero. At each event, the distribution of phase and  
207 tempo is discontinuously updated to a 2D Gaussian posterior, which evolves continuously between events.  
208 This scheme is similar to [27], which estimates phase and tempo by updating a 2D Gaussian posterior, but is  
209 updated in continuous time and is significantly more flexible in its capacity to track phase based on arbitrary  
210 expectation templates.

## 211 2.3 PIPPET with multiple event streams (mPIPPET)

212 Finally, we generalize PIPPET to include multiple types of events (indexed by  $j$ ), each generated as point  
213 processes with rates determined by functions  $\lambda^j(\phi)$  of a single underlying phase:

$$d\phi = dt + \sigma dW_t \quad (6)$$

214

$$\lambda^j(\phi) = \lambda_0^j + \sum_i \lambda_i^j \varphi(\phi | \phi_i^j, v_i^j) \quad (7)$$

215 The Kalman-Bucy estimate of phase for this model is described by mean  $\mu$  and variance  $V$  evolving  
216 according to the ODE

$$\begin{cases} \dot{\mu} = 1 - \sum_j \Lambda^j (\hat{\mu}^j - \mu) \\ \dot{V} = \sigma^2 - \sum_j \Lambda^j (\hat{V}^j - V) \end{cases} \quad (8)$$

217 and resetting to  $\mu_{t+} = \hat{\mu}^j$  and  $V_{t+} = \hat{V}^j$  when an event occurs in stream  $j$ , where we define  $\Lambda^j$ ,  $\hat{\mu}^j$ , and  $\hat{V}^j$   
218 as we defined  $\Lambda$ ,  $\hat{\mu}$ , and  $\hat{V}$  above but in reference only to event stream  $j$ .

219 The same adjustment can be made to the PATIPPET generative model, and the PATIPPET filter can  
220 be similarly generalized to account for multiple event streams.

## 221 3 Results

222 In this section we conduct a series of simulations to illustrate how the novel terms representing dynamic  
223 tracking of uncertainty and the influence of expectations in the absence of events allow the PIPPET and  
224 PATIPPET filters to reproduce perceptual and behavioral observations during human entrainment to audi-  
225 tory rhythms. Parameters for these simulations are listed in Appendix 6.3.

### 226 3.1 Updating posterior in response to events

227 We simulated the PIPPET filter with a single expectation peak and varied parameters to illustrate its basic  
228 behavior (Figure 2). Figure Figure 2, column  $i$  illustrates the effect of an event on the phase estimate as a  
229 function of initial estimated phase  $\mu_t$ . Events occurring when  $\mu_t$  is near an expected event phase  $\phi_1$  caused  
230  $\mu$  to shift linearly toward  $\phi_1$ . When we set the uniform rate of background events  $\lambda_0 > 0$ , events occurring  
231 far from the expected event phase  $\phi_1$  were attributed to the background and therefore caused negligible  
232 adjustment to the phase estimate. Phase uncertainty  $V_t$  decreased at events except when  $\lambda_0$  was positive  
233 and  $\mu$  was not sufficiently close to  $\phi_1$ ; in this case,  $V_t$  increased due to causal ambiguity, or stayed the same  
234 if the cause was unambiguously the uniform background source.

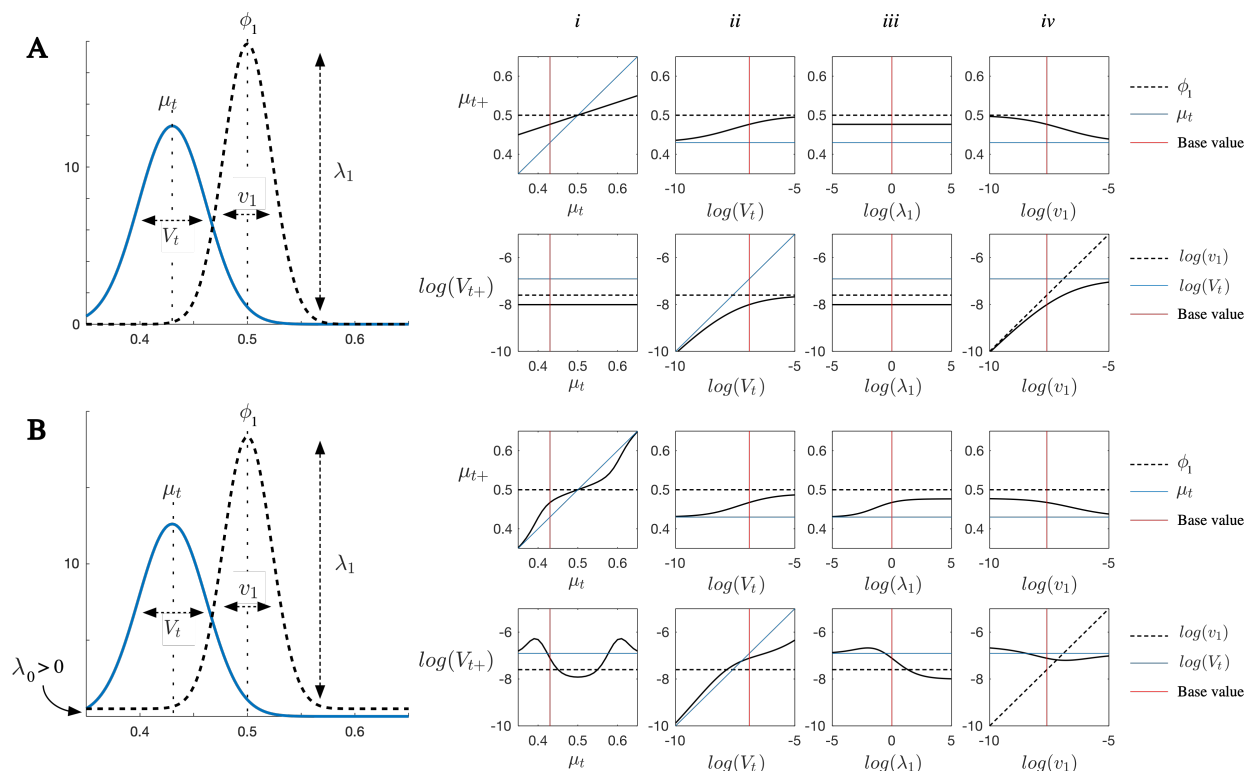

**Figure 2: Characterizing PIPPET's behavior at events.** A) An event is expected at phase  $\phi_1 = 0.5$  with variance  $v_1$  and expectation strength  $\lambda_1$ . The expected background event rate is set to  $\lambda_0 = 0$ . An event occurs when the phase estimate is at  $\mu_t$  with uncertainty  $V_t$ . Panels in columns *i-iv* show the resulting mean  $\mu_{t+}$  and variance  $V_{t+}$  of the posterior on phase as the parameters  $\mu_t$ ,  $V_t$ ,  $\lambda_1$ , and  $v_1$  are varied. *i*)  $\mu$  is corrected linearly toward  $\phi_1$ , while  $V$  decreases uniformly regardless of initial phase. *ii*) Corrections to  $\mu$  are more thorough when  $V_t$  is large. *iii*) These corrections do not depend on  $\lambda_1$ . *iv*) These corrections are more thorough for smaller  $v_1$ . B) The same simulations are carried out with background event rate  $\lambda_0 = 0.5$ . *i*) If  $\mu_t$  is close to  $\phi_1$ , it is linearly corrected toward  $\phi_1$  and  $V_t$  decreases; if it is far, no correction is made. In the liminal zone,  $V_t$  increases due to the ambiguity of whether the event was related to the expectation peak or due to the background source. *ii*)  $V_{t+}$  is larger due to the effect of ambiguity as to whether the event is associated with  $\phi_1$  or with the background rate. *iii*) Now the correction depends on  $\lambda_1$ : stronger expectations make this peak the favored cause relative to the background source. *iv*) Note that if the expectation peak is extremely narrow,  $V_{t+}$  may still be large after the event and  $\mu_t$  may not fully reset to  $\phi_1$  due to the aforementioned causal ambiguity.

## 235 **3.2 Tracking complex rhythms with uneven subdivision**

236 The PIPPET framework describes entrainment to rhythms in which each expected event phase may or  
237 may not be populated by an event. It is formulated in sufficient generality to describe entrainment to  
238 rhythms based on timing expectations with complex, non-isochronous stress patterns [28] and with non-  
239 integer duration ratios using suitably constructed (presumably learned) expectation templates  $\lambda(\phi)$ . Such  
240 rhythmic patterns have been shown to support highly precise synchronization in musicians with appropriate  
241 training and enculturated expectations [29], and should therefore be accounted for by models of human  
242 entrainment.

243 As an example of entrainment to a complex rhythm based on a temporal structure with non-integer  
244 duration ratios, we simulated entrainment to a swing rhythm. The rhythm is based on an underlying grid of  
245 “swung” eighth notes, where the first event of every pair is followed by a slightly longer inter-event duration  
246 than the second. Though the “swing” feel is often caricatured using eighth note pairs with a 2:1 duration  
247 ratio, this value has been shown to vary by with style and tempo and is certainly not limited to small  
248 integer ratios [30]. We used an expectation template with a swing ratio of 3:2 (though the exact ratio is not  
249 important) and associated the first eighth note in each pair with a stronger expectation than the second.  
250 The PIPET filter entrained to a complex, syncopated rhythm based on this template, drawing on the timing  
251 of both strongly and weakly expected events (Figure 3A). It corrected its phase estimate when an event  
252 timing shift or a phase shift was introduced into the rhythm (Figure 3B and 3C).

## 253 **3.3 Failure mode: too much syncopation**

254 The phase inference framework can account for human failures to track perfectly timed rhythms, i.e., rhythms  
255 in which every event falls at a peak of the expectation template. A prime example of this failure mode in  
256 human rhythm tracking is tracking overly syncopated rhythms (rhythms with a predominance of events at  
257 time points with weaker expectations). Listeners tend to “re-hear” such rhythms by attributing events to  
258 metrical positions where events are more strongly expected [31, 32].

259 In PIPPET, these failures consist of inferring the presence of phase noise where none actually occurred.  
260 Such behavior is a necessary consequence of Bayesian optimality: a given stimulus may be generated by  
261 different combinations of phase noise and point process event generation noise, and the inference process is  
262 concerned only with the most likely explanation for the stimulus, which may include phase noise even if the  
263 stimulus was actually generated without it.

264 Using the expectation template with a swing grid as in the previous section, we simulated a strongly  
265 syncopated rhythm (Figure 4A). The rhythm’s phase was not tracked successfully due to a convergence of two

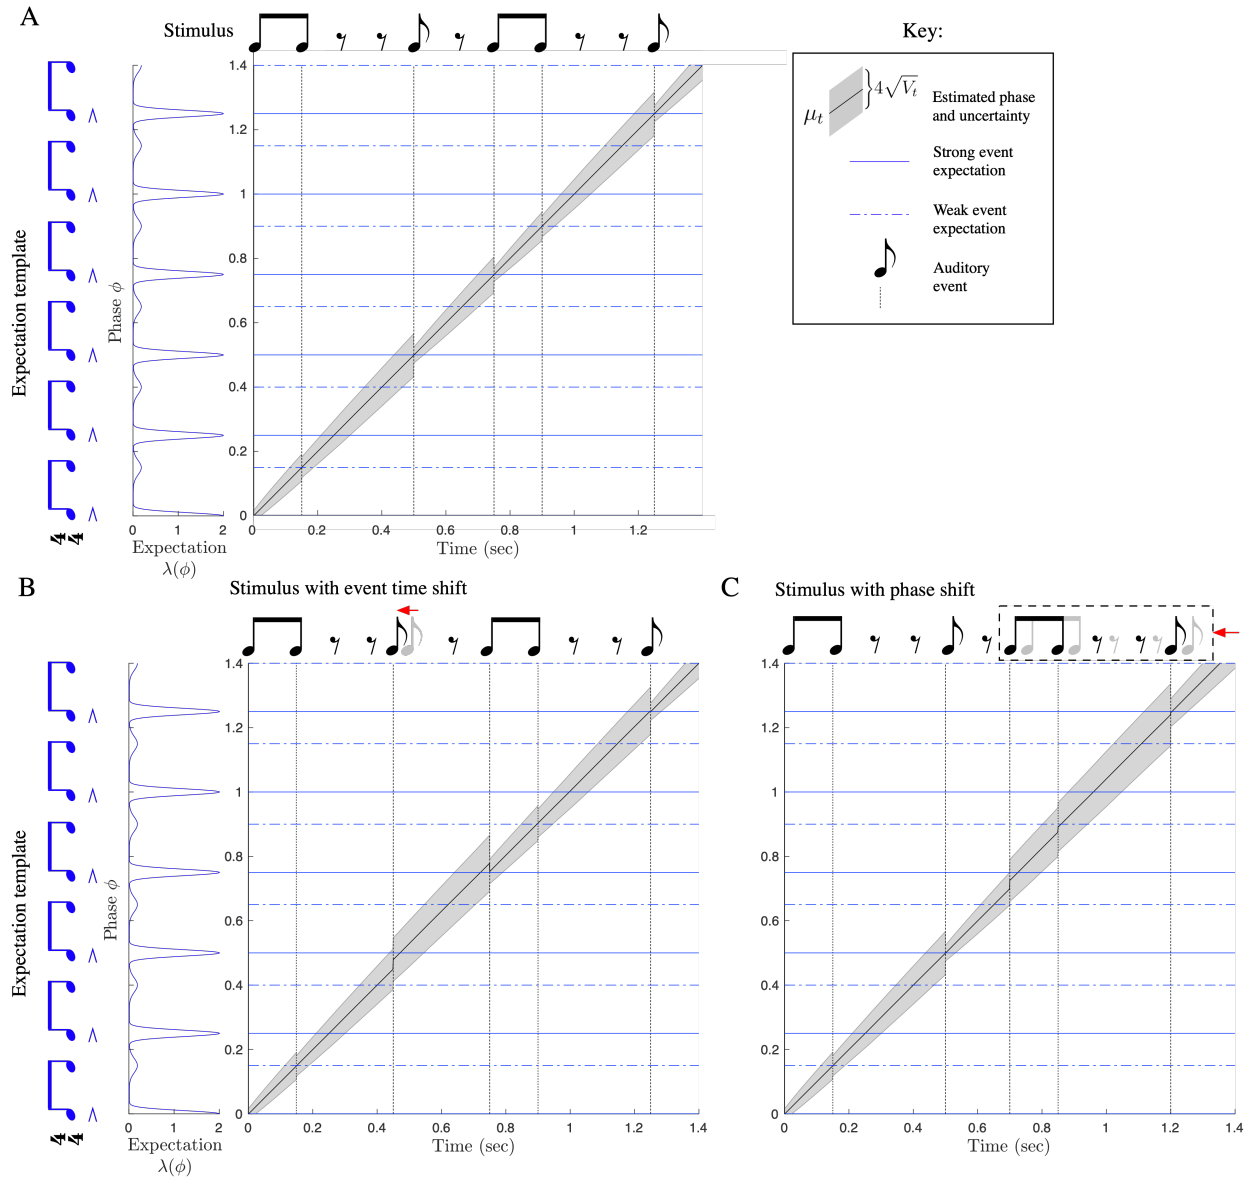

**Figure 3: Tracking phase through swung rhythms.** PIPPET is given a pattern of expectations representing “swung” eighth notes, with alternating longer and shorter inter-event durations and stronger, more precise expectations on the first of every pair. Dotted lines correspond to weaker expectations and solid lines correspond to stronger expectations. A) Phase is successfully tracked over the course of a rhythmic stimulus, with phase uncertainty growing between events and contracting at events. B) One event in the rhythm is shifted earlier in time. Estimated phase  $\mu_t$  adjusts partially to compensate for the timing shift, and then adjusts back at the subsequent event. Uncertainty  $V_t$  is not as effectively reined in by these unpredictably-timed events, but decreases as later events corroborate the corrected phase estimate. C) A phase shift is introduced into the rhythm, moving all subsequent events earlier in time. When the first early event arrives, uncertainty increases. Estimated phase is corrected over the first few events after the shift, and  $V_t$  decreases most substantially when the estimate  $\mu_t$  is corroborated by a strongly expected event happening at the appropriate estimated phase.

266 factors: the disproportionate influence of the higher peaks of the expectation template, and the accumulation  
 267 of phase uncertainty  $V_t$ . Phase uncertainty was only slightly reduced by events occurring at weakly expected

268 phases, so it accumulated over the course of the rhythm, and especially during the long silence. Once  $V_t$   
269 was large, indicating the possibility of substantial phase noise having accumulated, the higher expectation  
270 peaks  $\phi_i$  became the most likely explanations for events that were actually perfectly timed to coincide with  
271 nearby lower peaks – since precise event timing was no longer a reliable indicator of the source of an event,  
272 local peak height became the best indicator, and higher peaks won out. Thus, at each event, the estimated  
273 phase was adjusted to better align the higher peaks with the events.

274 The same rhythm could be successfully tracked in two alternate conditions. First, it was successfully  
275 tracked when we decreasing the rate of accumulation of phase uncertainty  $\sigma^2$  (Figure 4B), demonstrating the  
276 key role of uncertainty in making the system susceptible to the disruptive effect of syncopation. Second, it  
277 was successfully tracked when an additional stream of sensory input was added by simulating an isochronous  
278 finger tap (Figure 4C). We used mPIPET to create a second expectation template for tapping. As phase  
279 tracking was simulated, we planned new tap events just before  $\mu$  reached expected tap phases by extrapolating  
280  $\mu$  forward. When taps occurred, phase uncertainty decreased, reducing the disruptive effects of syncopation.  
281 Note that planning actions specifically to fulfill sensory expectations and using this sensory feedback to  
282 inform inference about the outside world is an example of “active inference”, the principle framework for  
283 understanding action in the literature on predictive processing [25].

### 284 3.4 Tempo inference

285 We simulated the PATIPPET filter with basic metronomic expectations to observe its capacity to infer  
286 phase and tempo at once. We gave the model a wide initial range of possible tempi and a simple metronomic  
287 stimulus with actual tempo near the upper end of that range. In these conditions and with the parameter  
288 set we chose, the model established the appropriate tempo and phase to within a tight range over the course  
289 of the first two events (Figure 5).

290 In addition to its value as a model of human rhythmic cognition, the PATIPPET filter shows promise  
291 as a general-purpose tempo tracking algorithm for musical applications. This would require a principled  
292 method of choosing values for the various free parameters of the generative model, which might be done a  
293 priori based on a labeled corpus, adaptively over the course of listening, or through some combination of the  
294 two. We leave a more thorough exploration of the relative performance of this model to future work.

### 295 3.5 Period-dependent corrections

296 In sensorimotor entrainment literature, finger taps entrained to a metronome generally shift to correct a  
297 certain fraction of an event timing perturbation on the next tap. This fraction is called  $\alpha$ . In human

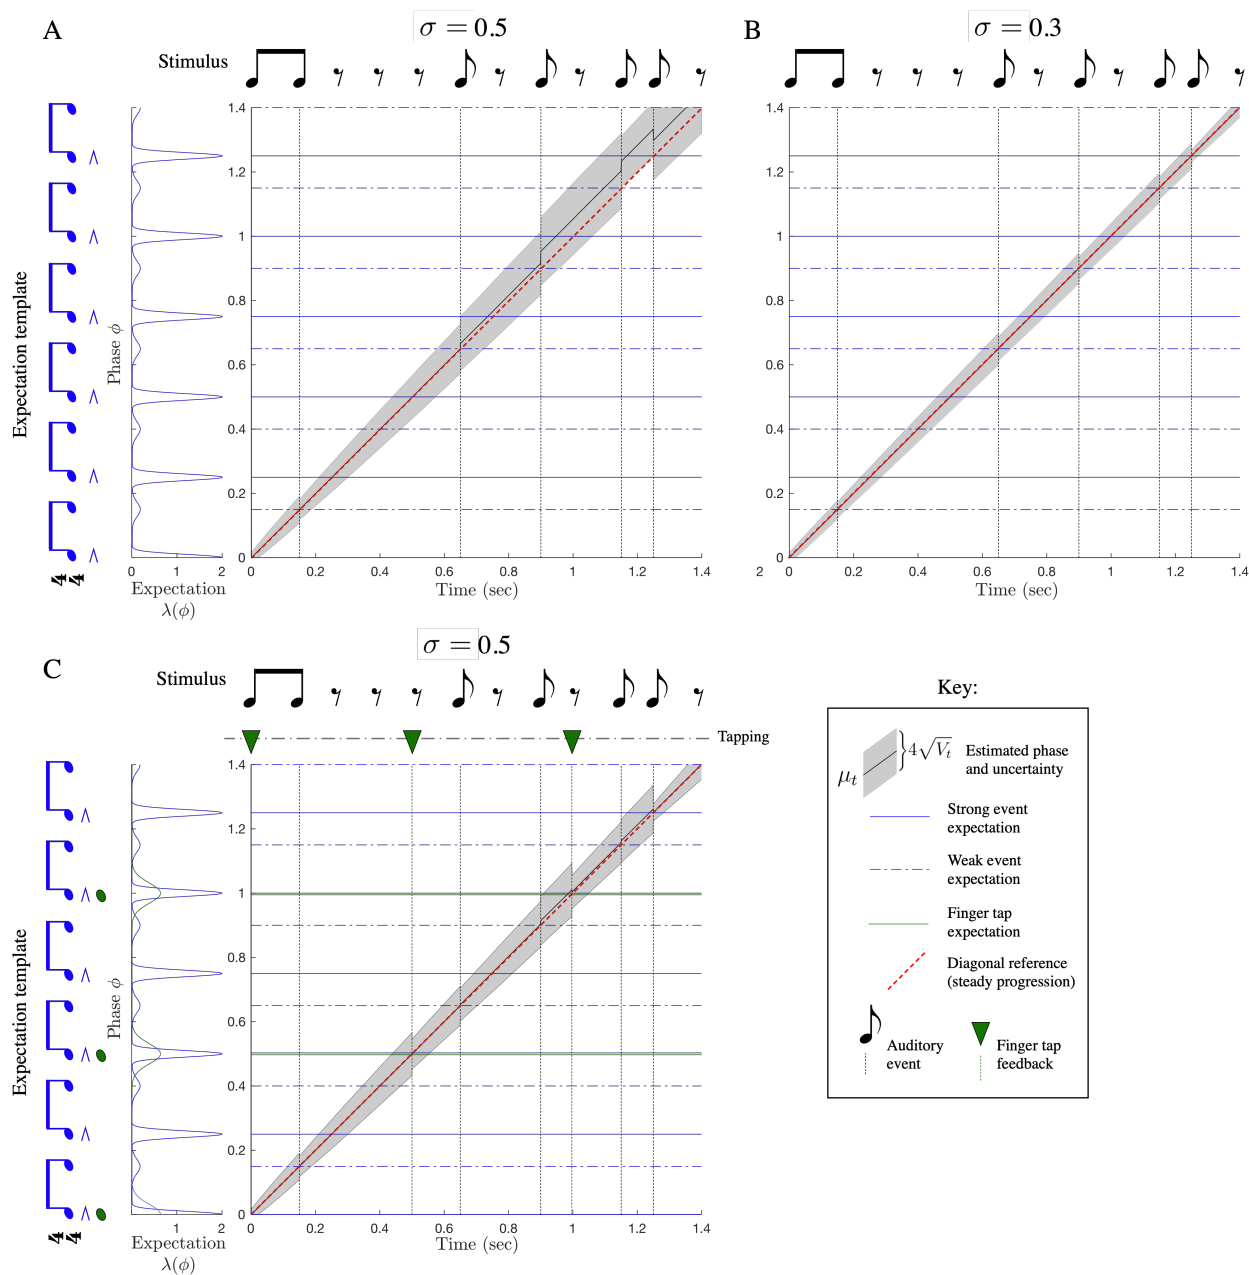

Figure 4: **Too much syncopation causes rhythm tracking failure.** A predominance of events associated with weak expectations combined with accumulated phase uncertainty can lead to a failure to track phase accurately. A) In this example, phase uncertainty  $V$  increases over a long silence. At the next event, this high uncertainty leads the model to partially attribute a weakly expected event to the nearby phase at which an event is strongly expected. As a result, the model ends up aligning the fifth event with a strong phase rather than a weak one, and overestimating phase at the final event (correct phase marked with yellow dot). B) When the rate of accumulation of phase uncertainty (i.e., the expected phase noise  $\sigma^2$ ) is decreased, phase is tracked correctly. C) Alternatively, phase can be tracked successfully by inserting an isochronous stream of finger taps and a suitable template for the alignment between expected auditory feedback from the taps and phase. We use mPIPET to simulate an expectation for isochronous taps (green notes and trace on the left). For simplicity, taps are placed every 0.5 sec; however, even noisy taps generated based on estimated phase could serve to reduce phase uncertainty and avoid a total phase tracking failure.

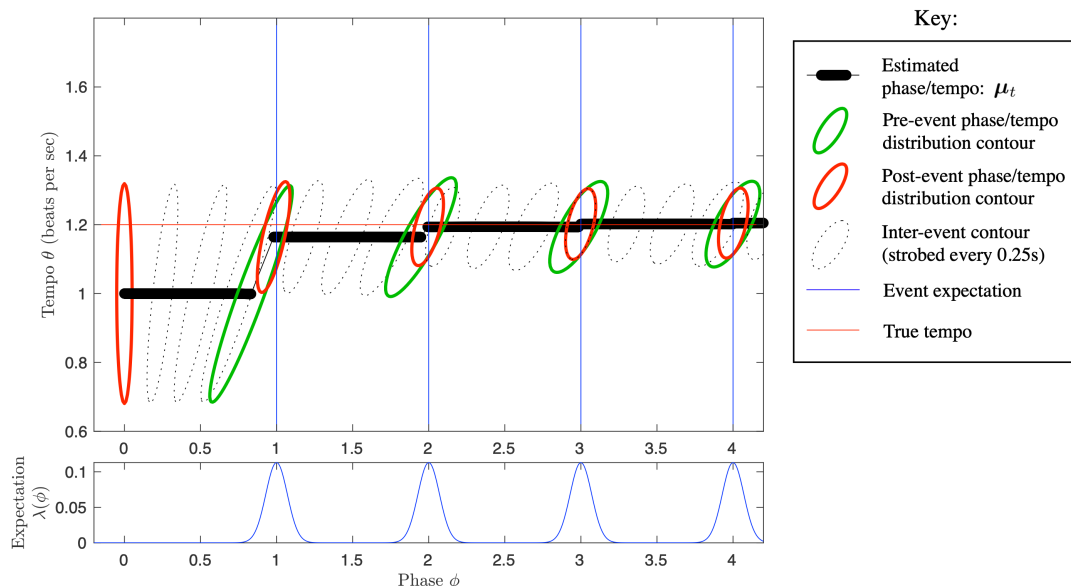

Figure 5: **The PATIPPET filter estimates phase and tempo.** PATIPPET is initialized with high tempo uncertainty. The first event occurs relatively early, causing the estimated tempo to increase. Each subsequent event occurs close to the time expected based on the estimated phase and tempo, causing the posterior to contract in both the phase and tempo direction as its prediction of event time is fulfilled and its phase and tempo estimates are corroborated. Ultimately, PATIPPET settles on a narrow distribution around the appropriate tempo as it continues to accurately estimate phase.

298 subjects,  $\alpha$  has repeatedly been observed to increase linearly with metronome period (“inter-onset interval,”  
 299 or IOI), exceeding 1 (i.e., over-correction) for sufficiently long IOIs [33, 34].

300 The phase inference framework offers a principled explanation for  $\alpha$  increasing with IOI. During an event-  
 301 free interval, phase uncertainty increases over time. When an event does occur, the precision of the prior  
 302 distribution on phase and tempo is weighed against the precision of the likelihood function associated with  
 303 the expectation of that event. If the prior is less precise due to accumulated uncertainty, the precision of  
 304 the likelihood weighs more heavily against it and the adjustment in phase is more thorough. Thus, all else  
 305 being equal, events spaced more widely apart in time induce more extensive phase corrections.

306 Since the strongest phase correction PIPPET can make at an event is to fully update the phase estimate  
 307 to the expected event time, it cannot account for  $\alpha$  values above 1. However, it has been previously suggested  
 308 that  $\alpha$  may exceed 1 for long metronome periods due to some period correction occurring in addition to phase  
 309 correction [33]. We were therefore curious to see whether PATIPPET could reproduce the linear increase of  
 310  $\alpha$  with increasing IOI up to and beyond  $\alpha = 1$ .

311 In Figure 6, we show that with appropriate parameters, PATIPPET can indeed reproduce the experi-  
 312 mental observation of a near-linear increase in  $\alpha$  from below to above 1 as IOI increases. In PATIPPET, this



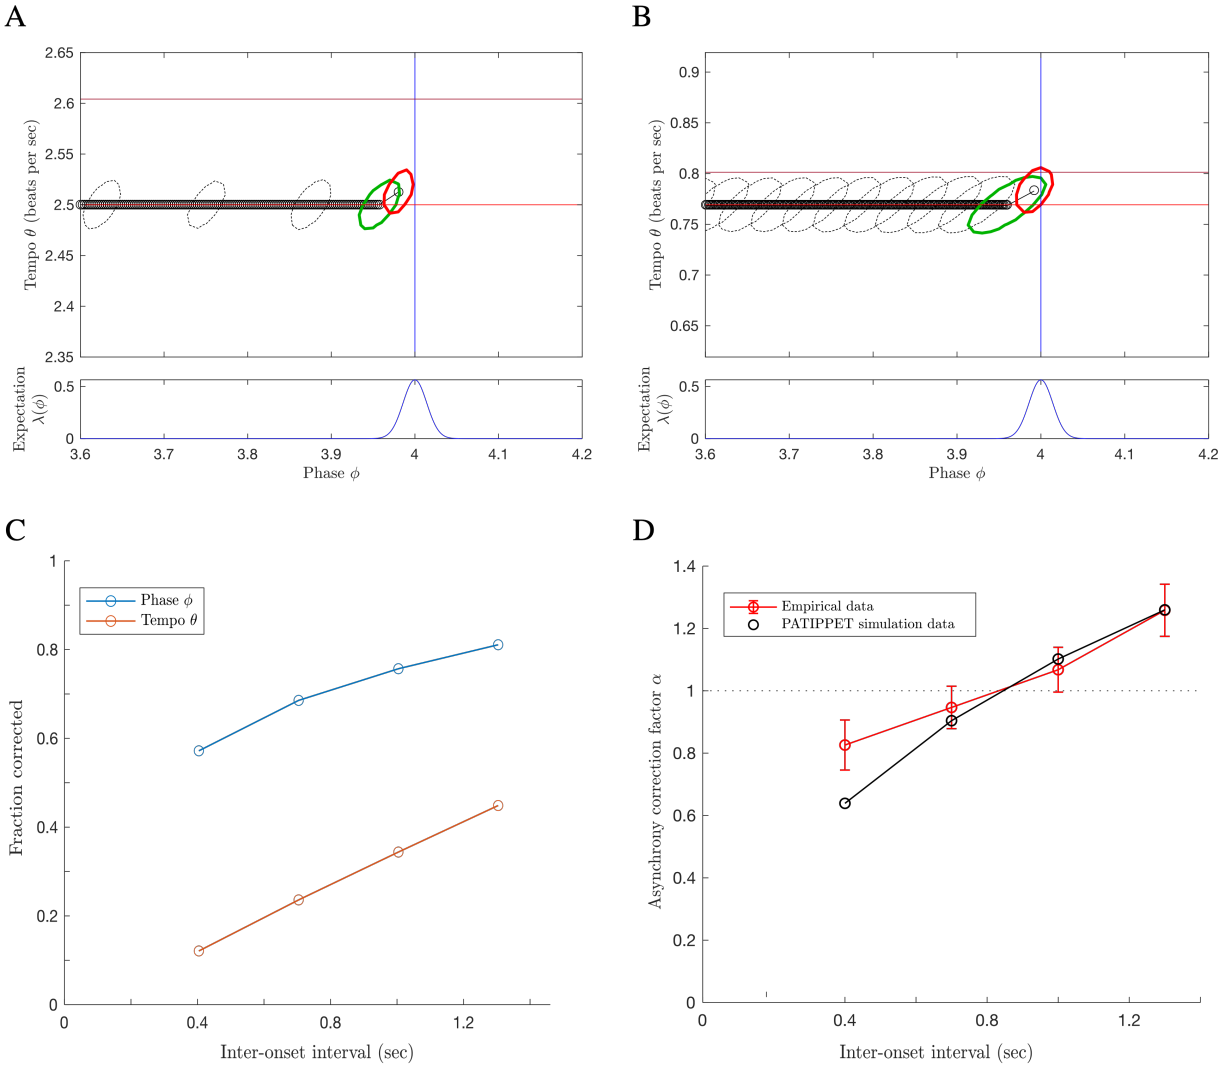

Figure 6: **PATIPPET reproduces human tapping data showing stronger error correction for longer inter-onset intervals.** A and B) The distribution on phase and tempo leading up to and following a phase shift at the fourth event in an isochronous sequence for two different metronome tempi, i.e., two different inter-onset intervals. (Same color key as Figure 5, but with phase/tempo distribution contours strobed every .05 sec.) Note that when the IOI is short, PATIPPET arrives at the phase-shifted event with a high degree of phase and tempo certainty. C) PATIPPET makes a proportionally larger correction to phase and tempo for long IOIs than for short IOIs due to the greater degree of uncertainty preceding each event. D) Alpha ( $\alpha$ ) is the proportion of a phase shift that is corrected at the next tap time. With this set of parameters, PATIPPET reproduces the empirical observation from [34] that the phase shift is undercorrected when IOIs are short and overcorrected  $\alpha > 1$  when IOIs are long.

313 phenomenon is a natural consequence of optimal inference in the context of phase and tempo uncertainty  
 314 that accumulates between observed events.

### 315 **3.6 Time warping in the absence of expected events**

316 When an event in a rhythmic stimulus is strongly expected but no event occurs, an optimal Bayesian observer  
317 should initially be biased to believe that in spite of their current phase estimate, the stimulus may not have  
318 reached the expected event phase yet. The result should be that a perfectly timed event later in the stimulus  
319 will seem to be arriving earlier than expected: in other words, the tempo of the stimulus will seem to  
320 accelerate. The degree of this effect will depend on the observer’s degree of phase and tempo uncertainty.

321 There is evidence of such an effect in human rhythm perception. The “filled duration” illusion is the  
322 impression that an isochronous sequence has changed tempo when it is initially subdivided by additional  
323 predictable events and then subdivisions are eliminated. According to multiple reports, the magnitude of this  
324 effect is reduced or eliminated if the empty intervals precede the filled intervals [35, 36, 37, 38] (though there  
325 is some disagreement about this [39]), suggesting that it is indeed the established expectation of continuing  
326 subdivision that interferes with the perceived passage of time when the subdivisions cease. A second result  
327 that could be similarly accounted for is the surprising finding in [40] that a participant tapping along with  
328 a subdivided beat delays their tap following the omission of an expected subdivision. If taps are planned to  
329 coincide with the arrival of a specific mean estimated phase, then the slowing of estimated phase induced by  
330 an omission of a strongly expected event should indeed delay the subsequent tap.

331 We stimulated PATIPPET with a strong isochronous expectation template by scaling up  $\lambda$  and pre-  
332 sented it with a “filled duration” in which all expected events occurred and an “empty duration” in which  
333 events occurred only at the beginning and end of the interval (Figure 7). PATIPPET loyally tracked phase  
334 through the filled duration; however, when strongly expected events were omitted, the mean phase estimate  
335 slowed down at each expected event phase, leading to an overall slowing in estimated phase advance and an  
336 unexpectedly early onset of the event marking the end of the empty duration (Figure 7A).

337 Specifically timed event expectations are not necessary to produce a filled duration illusion: random  
338 raindrop sounds were sufficient to lengthen produced intervals during audiomotor synchronization task [41].  
339 In PATIPPET, a filled duration effect was also produced when the expectation template consisted only of  
340 a high expected background rate of events  $\lambda_0$ . In this case, estimated phase advance slowed during the  
341 empty interval because estimated tempo dropped. The PATIPPET filter effectively noted that not as many  
342 events were occurring as expected, and in response it lowered estimated tempo because a lower event rate is  
343 expected at a lower tempo. This type of explanation could be invoked to offer a normative account for other  
344 non-rhythmic filled interval illusions, though doing so is beyond the scope of this work.

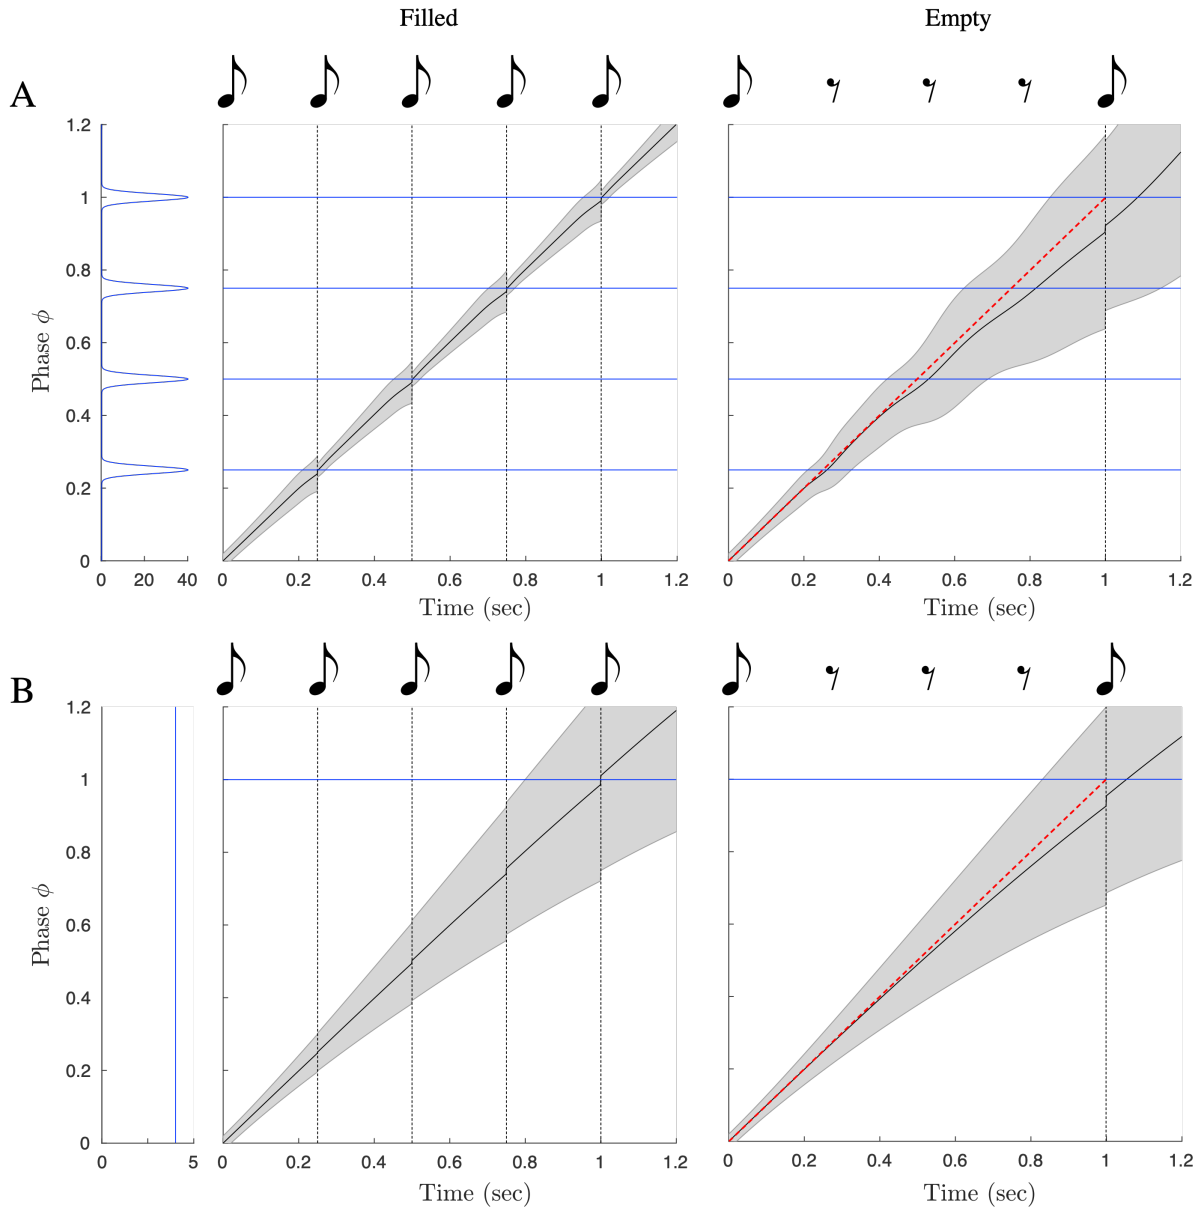

**Figure 7: The filled duration illusion: time warping by the omission of strongly expected events.** (Same image key as 4, with shading displaying PATIPPET phase variance.) A) PATIPPET is simulated with strong expectations for isochronous events. Left: When a set of strongly expected events occur as expected (a filled duration), estimated phase stays on track, advancing (on average) at a rate of 1. Right: When the duration is empty, estimated phase deviates from steady progression (red diagonal) by dragging as each expected event point approaches and passes, leading to the illusion that the event marking the end of the interval has arrived earlier than expected. B) PATIPPET is simulated with a high expected background rate of events  $\lambda_0$ , but no phase-specific event expectations  $\phi_i$ . In this case, too, an empty duration leads to dragging estimated phase and an unexpectedly early final event.

## 345 4 Discussion

346 Here we have presented PIPPET, a framework representing entrainment to a time series of discrete events  
347 based on a template of temporal expectations. PIPPET treats the event stream as the output of a point  
348 process modulated by the state of a hidden phase variable. The PIPPET filter uses variational Bayes  
349 to continuously estimate phase and track phase uncertainty based on this generative model. PATIPPET  
350 extends PIPPET to include a generative model of tempo change, and the PATIPPET filter simultaneously  
351 estimates phase, tempo, and the covariance matrix representing their uncertainty and their codependence.  
352 This framework is intended to serve as a hypothesis for how the human brain integrates auditory event  
353 timing to inform and update an estimate of the state and rate of an underlying temporal process.

354 PIPPET and PATIPPET reproduce several qualitative features of human entrainment, including realistic  
355 failures to track overly perfectly-timed but over-syncopated rhythms, perceived acceleration of a metronomic  
356 pulse when strongly expected events are omitted, and error correction after metronome timing perturbations  
357 that increases with increasing inter-onset interval. We show that these three phenomena all follow naturally  
358 from our framing of entrainment as a process of Bayesian inference based on specific phase-based temporal  
359 expectations.

### 360 4.1 Relationship to other models of timing

361 The dynamics of PIPPET and PATIPPET in response to sensory events are similar to dynamics of other  
362 entrainment models that correct phase and period based on event timing, e.g., [42, 43]. Models based on  
363 Dynamic Attending Theory, e.g., [11, 12], are also similar in explicitly modeling timing expectations and  
364 their effect on phase and period adjustment. The phase inference framework differ from these existing models  
365 in four key ways. First, they are derived as optimal solutions to specific inference problems, and therefore all  
366 modeling decisions can be justified within a normative framework. Second, they are formulated in sufficient  
367 generality to describe entrainment based on non-isochronous and even aperiodic temporal expectations, an  
368 area that has lately received increasing experimental attention [6, 44, 45] but has been largely neglected in  
369 entrainment modeling. Third, they allow expectations to influence the inferred phase even in the absence  
370 of sensory events, creating the time-warping effect of disappointed expectations evidenced in humans by the  
371 “filled duration” illusion. Finally and most critically, they explicitly track uncertainty in phase and tempo,  
372 providing a system for moderating between assimilation of new timing data and loyalty to an internal sense  
373 of time.

374 Bayesian methods have been used elsewhere to analyze rhythmic structure as time series of point events.  
375 Some of these are application-focused methods that require offline analyses [46, 47] and therefore do not

376 serve as satisfying models of real-time behavior. Cemgil et al (2000) [27] use a Kalman filter that tracks a  
377 distribution on phase and tempo similarly to PATIPPET. However, this model is structured to infer phase  
378 and tempo event-by-event rather than in continuous time, and is not equipped to handle complex rhythms  
379 or temporal structures more complex than approximate isochrony.

380 Bayesian inference has also been used to model timing estimation in the brain (e.g., [20, 21]), but it is  
381 generally used to describe inferences about discrete variables like interval durations and event times, whereas  
382 PIPPET describes a continuous inference process underlying predictions about event times. One such model  
383 leading to particularly PIPPET-like results was presented in Elliot et al 2014 [22]. The authors created a  
384 Bayesian model to explain the results of an experiment that had participants tap along to a stimulus consist-  
385 ing of two jittered metronomes. The model behaves similarly to PIPPET in that it estimates the next event  
386 time using a weighted average of previous event times and prior beliefs, with weights informed by expected  
387 timing precision. However, like [27], their model infers the anticipated timing of discrete, metronomic events,  
388 whereas PIPPET predicts and updates an underlying phase in continuous time and can therefore generalize  
389 to non-isochronous and complex rhythms and account for the effects of event omissions. Additionally, in or-  
390 der to account for participants ignoring events far from predicted time points, they introduce the assumption  
391 that participants repeatedly test the hypotheses that events come from one or two separate streams, whereas  
392 PIPPET naturally accounts for this phenomenon by attributing stray events to a uniform background event  
393 rate  $\lambda_0$ .

## 394 **4.2 Interpreting the generative model**

395 The PIPPET generative model is formulated as though it implements perfect variational Bayesian inference  
396 on inherently stochastic stimuli. However, Bayesian computations in the brain are often invoked to com-  
397 pensate for internal as well as external sources of stochasticity [48], and in the case of PIPPET the most  
398 reasonable interpretation may be a combination of the two possibilities. In reality, we do not often listen  
399 to musical rhythms with random timing and phase jitter; however, neural noise and interaction with other  
400 ongoing processes may introduce timing variability into the processing of sensory events and give rise to  
401 variability in the process of tracking estimated phase. This interpretation also allows for changes in gener-  
402 ative model parameters based on internal states that might affect internal noise levels, e.g., attentiveness  
403 (which has been shown to affect tempo correction but not phase correction [49], and which therefore might  
404 be modeled through its effect on  $\sigma_\theta$ ). Ideally, the phase inference framework could be reconstructed based  
405 on assumptions of a combination of internal and external noise; however, that is beyond the scope of the  
406 current work.

407 Given this ambiguity, the generative model parameters may ultimately reflect some combination of the  
408 empirical statistics of rhythmic stimuli and internal factors. We briefly discuss the precision parameters  $v_i$   
409 as an example. First, an upper bound on the precision of expected event timing is the precision of sensory  
410 timing perception, which is, for example, high for human audition and significantly lower for human vision<sup>1</sup>.  
411 Second, expected event timing precision may further reflect the observed relative timing distributions of  
412 event streams. These observations may inform expectations on time scales ranging from a single sitting to  
413 a lifetime of listening. Expected timing may be learned separately for different sensory modalities, different  
414 musical genres (e.g., techno vs. funk), or even different instruments (e.g., kick drum, snare, hi-hat, as  
415 discussed below). The precision of a beat-based temporal expectation is closely related to the width of a  
416 “beat bin,” the window of time (rather than a single time point) that is proposed to constitute the “beat”  
417 in [50], and to the width of the temporal “expectancy region” described in dynamic attending theory [11];  
418 in both cases, this width is increased by imprecision in the immediately preceding stimulus.

### 419 **4.3 Testable behavioral predictions**

420 Given the ambiguous interpretation of the generative model discussed above, the question of whether human  
421 expectation-based entrainment is truly described by a normative framework may be ill-posed. However, two  
422 key qualitative elements of this framework can be tested directly: the tracking of phase uncertainty and  
423 the influence of expectations in the absence of events. Seeking further experimental evidence of these two  
424 phenomena would help determine the value of phase-inference-based models in describing human entrainment  
425 behavior.

426 The phase inference framework predicts that the accumulation of uncertainty over the course of empty  
427 time has a critical effect on the perceptual interpretation of subsequent events. In Figure 4, we show a rhythm  
428 that is perceptually misinterpreted due in part to empty time preceding syncopation. An experiment could  
429 be designed along the lines of [32] to test this aspect of the phase inference framework by measuring the  
430 effect of empty time on the interpretation of rhythmic stimuli that follow.

431 A second prediction along these lines is that various measurable perceptual phenomena, including period-  
432 dependent error correction in motor entrainment, perceptual parsing of ambiguous rhythms, and suscepti-  
433 bility to temporal illusions such as the filled duration illusion, should depend critically on levels of phase  
434 and tempo uncertainty. Assuming that the parameters of uncertainty tracking vary across individuals, the  
435 PIPPET/PATIPPET framework would predict correlations in measurements across these domains: certain

---

<sup>1</sup>An event can only be experienced after it occurs, so (as pointed out in [21]) the likelihood function on underlying phase associated with this type of uncertainty should be asymmetrical. The analytically tractable incarnation of our framework presented here uses Gaussian likelihood peaks, so cannot account for the effect of asymmetrical likelihoods; however, we could posit a  $\lambda$  function with asymmetrical peaks and use numerical methods rather than the explicit solution derived here to estimate underlying phase at each time step.

436 individuals should show increased sensitivity to temporal illusion, misleading rhythms, and the effect of pe-  
437 riod on error correction. Further, stimulus manipulations that affect phase and tempo uncertainty, including  
438 the temporal precision of the auditory events and the length of the click train establishing an initial tempo  
439 estimate, should have direct and predictable effects on these perceptual and behavioral measures.

440 Third, the phase inference framework predicts that omissions of strongly expected events should sys-  
441 tematically distort estimates of phase and tempo, or, perhaps indistinguishably, of elapsed time. These  
442 effects could be explored by parametrically manipulating event expectations through priming stimuli and  
443 then measuring distortions induced by event omissions through perceptual report or timed motor response.

444 If we find situations in which human behavior qualitatively differs from solutions to the inference prob-  
445 lems posed by PIPPET and PATIPPET, these can be interpreted in two perfectly valid ways: either human  
446 behavior has not been optimally tuned for the task at hand, or we have not correctly identified and encaps-  
447 ulated the task and its survival-relevant objective. If we follow the latter interpretation, we might attempt  
448 to refine the generative model, e.g., by introducing the belief that tempo changes occur in jumps or ramps  
449 rather than as random drift, or to modify the objective of the task, e.g., by including additional cost functions  
450 or priors associated with perceptual report or motor output as discussed above.

#### 451 **4.4 Application to analysis of behavioral data**

452 The phase inference framework offers a predictive processing lens for understanding the results of rhythm  
453 perception and production experiments. Given a perceptual or behavioral task, we can suppose that motor  
454 or perceptual human entrainment behavior is optimally solving an inference problem, and determine the  
455 parameters of that problem by fitting them with appropriate methods. These parameters come with natural  
456 interpretations in the language of prediction and precision. We can then study the changes in these param-  
457 eters over the course of an experiment, over different variations on the same experiment, over the human  
458 lifespan, across cultures, etc.

459 For some experimental data, the many parameters available in PIPPET may prove redundant. For  
460 example, the observation of weak error correction in entrained tapping could be explained by imprecise  
461 auditory timing expectations (high  $v_i$ ), an overly precise internal model of phase (low  $V_t$ , caused perhaps by  
462 low  $\sigma$ ), or overly precise tap feedback timing expectations (as discussed below). However, we believe these to  
463 be meaningful distinctions that call for disambiguation through carefully designed experiments – for example,  
464 skipping taps to separate out the precision effects of tapping feedback or varying silent durations within the  
465 stimulus to separate the accumulating effects of phase uncertainty  $V_t$  from the history-independent effects of  
466 timing expectation uncertainty  $v_i$ . For experiments that do not take such measures, redundant parameter

467 sets that fit the data may be interpreted as meaningfully different possible interpretations of the results.

#### 468 4.4.1 Multiple event characteristics

469 mPIPPET generalizes the PIPPET/PATIPPET framework to cases of multiple distinguishable event types,  
470 each with its own set of expectations as a function of phase. One example could be listening, tapping, or  
471 dancing to a kit drum track with bass drum, snare, and hi-hat cymbal. Timing perturbations of different  
472 instruments in drum rhythms have been shown to differently affect human entrainment [51]. By letting  $j$   
473 take values from  $\{bass, snare, hi-hat\}$  and choosing appropriate values for  $\phi_i^j$ ,  $v_i^j$ , and  $\lambda_i^j$  for each event  $i$  on  
474 the metrical grid, one could create a set of timing expectations with strength and precision dependent on  
475 the specific drum and metrical position that could then be used to optimally track underlying phase and  
476 tempo through a complex kit drum rhythm. A similar setup could be used to implement the assumption that  
477 pitches in a melody match the harmonic context more often in strong metrical positions, allowing rhythm  
478 parsing during melody listening to be influenced by scale degree.

479 Alternatively, the  $j$  index may be used to treat events over multiple sensory modalities. Visual event  
480 timing is judged with less precision than auditory event timing in perceptual report [21] and in timing-  
481 sensitive sensory pathways [52], and might therefore be modeled with a less precise expectation template.  
482 (Note, however, that visual information may not have the same access to motor-related brain regions used  
483 for auditory entrainment [53], so the same modeling framework may not be appropriate.)

484 mPIPPET with  $j \rightarrow \infty$  can be used to account for a continuum of event types. Thus, we could create a  
485 forward model in which it is more likely for notes played with stronger accents to fall on strong beats, or in  
486 which lower pitches are expected with higher timing precision [54] and therefore exert greater influence on  
487 neural entrainment [55].

488 The phase inference framework could be further generalized to take into consideration additional stream of  
489 continuous input. This could be visual input from watching a pendulum, auditory input from a continuously  
490 modulated sound, or proprioceptive feedback from continuous entrained motion (as opposed to discrete,  
491 timed proprioceptive feedback like tapping). This goes beyond the scope of the mathematics presented here,  
492 but is a straightforward application of results proven in [23].

#### 493 4.4.2 Tapping

494 As illustrated in Figure 4, mPIPPET can be used to describe entrained tapping data. Experiments have  
495 shown that the presence of entrained tapping prior to temporal perturbations in a metronomic stimulus  
496 reduces the phase correction response [56], indicating that the estimate of moment-by-moment phase is  
497 influenced by the proprioceptive, tactile, and auditory feedback from tapping. The phase inference framework



498 is well-suited to modeling this influence as its own separate stream of informative input, though a thorough  
499 tapping model would require introducing noise into tap execution and into the phase tracking process itself.

500 Importantly, using tap times to inform an estimate of underlying phase challenges our interpretation of  
501 this phase representing a purely external source of temporally patterned events. Instead, the inferred phase  
502 would be a hybrid of an external phase and the phase of one's own motor cycle. Functionally, this is similar  
503 to the perceptual oscillator forced by both an external stimulus and one's own periodic action proposed by  
504 [57]. This may be an especially useful way to think about synchronization with another agent, where one  
505 can adopt strategies ranging from following (assigning high precision to input from the other) to leading  
506 (assigning low precision to input from the other, and possibly higher precision to self-generated events). See  
507 [58] for a discussion of such a coding strategy as a means of minimizing representational neural resources.

#### 508 **4.4.3 Aperiodic rhythm, speech, and musical grammar**

509 One specific question that the phase inference framework might help resolve is how periodic and nonperiodic  
510 entrainment differ. PIPPET does not intrinsically differentiate between these two processes; however, since  
511 it is sufficiently general to model both, it could guide an exploration of parameter differences between the  
512 performance of similar tasks in periodic and aperiodic contexts. (For neural and behavioral evidence of  
513 differences between memory-based and periodicity based entrainment, see, e.g., [45, 6].)

514 By accommodating aperiodic expectations with any degree of precision or imprecision, the phase inference  
515 framework may be especially well-suited to modeling the loose temporal regularities of speech [59]. However,  
516 as currently formulated, it is limited in that expectations are not history-dependent: the occurrence or  
517 absence of an event does nothing to the expectancy of an event at a later timepoint. This is appropriate  
518 for modeling the metrical aspect of rhythmic expectancy, but does not address the grammar-like structure  
519 of music rhythm [60], i.e., the expectation of certain temporal patterns of events over others regardless of  
520 their metrical positions. Speech, of course, is even more thoroughly grammatical, with certain sound events  
521 strongly shaping the temporal and spectral patterns expected in the immediate future.

522 Such effects could be readily incorporated into the phase inference framework by adding history depen-  
523 dence to the expectation template  $\lambda$ , though that is beyond the scope of this work. The precise details of this  
524 history dependence in rhythm parsing could be based on any suitable formal model for rhythmic grammar  
525 (e.g., [61, 62, 60]), and for speech applications could include whatever aspects of the co-dependence of timing  
526 and content expectations were appropriate for the task at hand.

## 527 **4.5 Limitations and possible extensions of the phase inference framework**

### 528 **4.5.1 Perceptual vs. motor entrainment**

529 PIPPET is formulated as a perceptual process, without specific reference to how entrained movement is  
530 produced by this process. In presenting the PIPPET framework and using it to explain tapping results, we  
531 have posited that perceptual and motor entrainment are rooted in the same internal tracking of the phase  
532 of an external process. However, perceptual and motor measures of entrainment sometimes give conflicting  
533 results: for example, exposure to musical performance with expressively irregular timing affects perceptual  
534 reports of timing in subsequent stimuli [63], but does not affect phase correction in tapping to subsequent  
535 stimuli [64].

536 We expect that both physical entrainment and perceptual report are informed by a neural process of  
537 estimating underlying phase. Principles of economy suggest that they should share in such an estimate rather  
538 than drawing on separately instantiated processes of neural inference, and experimental correlations between  
539 motor and perceptual results tentatively support this conclusion (e.g., [65]). However, it is possible that rapid,  
540 automatic audiomotor adjustment mechanisms have been selected to prioritize speed over precision (e.g., the  
541 spinocerebellar vermis [66]), especially in the case of entrainment to simple isochronous stimuli, and thus  
542 may not take uncertainty into account. If this is the case, then motor entrainment experiments not be clean  
543 indicators of perceptual management of uncertainty until the effects of these mechanisms are separated out.

### 544 **4.5.2 Learning expectation templates**

545 If the brain does treat entrainment as a process of inference based on a generative model, this raises the  
546 question of how the properties of the generative model are established in the first place. The PIPPET  
547 framework does not address this question directly, but by examining the parameters necessary to formulate  
548 PIPPET, we can clearly see what components need to be in place before a process of continuous phase and  
549 tempo updating can begin.

550 First, the brain must learn the temporal structures of the expectation template for rhythmic expectation.  
551 Learning these underlying structures from an experiential corpus of noisy, complex rhythms is not trivial. It  
552 seems likely to involve some type of bootstrapping in which a recognition of some degree of temporal structure  
553 allows for attribution of events to positions in that structure, allowing for deeper structure learning. Earlier  
554 exposure to simpler, less complex rhythms would likely help with such a bootstrapping process. (For a  
555 discussion of the challenges of this type of simultaneous learning and filtering and a proposed solution for  
556 non-point-process data, see [67].)

557 The brain must also learn noise and precision parameters for the model. Note that neither the temporal

558 expectation variance parameters  $v_i$  nor the noise parameter  $\sigma$  necessarily correspond to the actual precision  
559 of the neural or external timing mechanisms in play. The brain may underestimate the noisiness of the  
560 timing process it uses to track underlying phase, leading to under-adjustment to auditory event timing and  
561 minimal time-warping between events, or do the opposite. Presumably, these parameters must be learned  
562 through experience and prediction error.

### 563 **4.5.3 Selecting and updating expectation templates**

564 When the brain is exposed to a rhythmic stimulus, it must first recognize that a predictable pattern exists and  
565 select an appropriate expectation template from its learned repertoire. This is its own process of inference,  
566 and may be amenable to a Bayesian description. Since the PIPPET filter maintains a unimodal posterior,  
567 it is not well-suited to model this initial inference process, which may require maintaining a distribution  
568 over multiple distinct possible starting phases and expectation templates. This problem might be partially  
569 addressed by incorporating a model that evaluates multiple distinct hypotheses for beat or meter (e.g. [68,  
570 69], or [70] with appropriate probabilistic interpretation) as an additional level of inference in parallel with  
571 ongoing phase and tempo inference.

## 572 **4.6 PIPPET in the brain**

573 Though PIPPET and PATIPPET are abstract models not committed to a particular brain-based imple-  
574 mentation, advances in the brain basis of timing and beat-keeping combined with the hypothesized neural  
575 bases of predictive processing suggest the beginnings of a plausible approximation of PIPPET in the brain,  
576 described below.

577 The essential aspect of the PIPPET framework that qualitatively differentiates its behavior from previous  
578 models is the explicit tracking of uncertainty over time for the purpose of informing the relative weights of  
579 sensory event timing and internal state estimates. There have been various proposals of how uncertainty  
580 is represented and utilized in the brain, and the system likely differs by task and type of uncertainty [71,  
581 48]. One proposal is of particular interest in relation to timing: uncertainty about a hidden state may be  
582 computed in medial frontal cortex and signalled via dopaminergic neurons in the ventral tegmental area [72].  
583 In this case, the hidden state would be the phase and tempo of the stimulus. This proposal is consistent  
584 with the observations that dopaminergic neurons encode of certainty in the temporal expectation of sensory  
585 cues [73] and that dopamine receptor antagonism in humans causes increased timing uncertainty [74].

586 In the predictive processing literature, dopamine is often given the role of signaling certainty (“expected  
587 precision”) across levels of hierarchical processing [75]. In this framework, it participates in probabilistic

588 computations by weighting the input to error-calculating neural populations, causing these errors to be  
589 weighted more heavily in the ongoing process of error-minimization that implements variational Bayesian  
590 estimation of hidden states. Different dopaminergic populations may signal precision at different levels of  
591 processing; in particular, dopamine may signal precision of both higher-level state estimates and lower-level  
592 sensory expectations. Thus, phase certainty  $V_t^{-1}$  and expected timing precision  $v_t^{-1}$  may both influence  
593 computation through dopaminergic signalling.

594 Experiments with non-human primates have shown neural trajectories in medial premotor cortex (MPC,  
595 encompassing the supplementary and pre-supplementary motor areas) that represent progress through self-  
596 generated behavioral processes. The author hypothesizes in [76] that similar trajectories represent rhythmic  
597 phase in human MPC. A representation of a linear phase  $\phi$ , used in the phase inference framework for  
598 flexibility and mathematical tractability, would seem to be a limiting factor for implementation in the  
599 brain. For shorter, aperiodic learned patterns of temporal expectation, phase could be represented by short,  
600 aperiodic trajectories [77], as observed in primates in timed response tasks; for simple periodic patterns, phase  
601 could be represented circularly [78], as observed in isochronous tapping tasks; and for longer, hierarchical  
602 patterns, phase could be represented by hierarchically structured trajectories that loop but also evolve in  
603 other dimensions, as observed in cyclic behaviors whose sensory components change from one cycle to the  
604 next [79].

605 Guided by the “Action Simulation for Auditory Prediction” (ASAP) hypothesis presented in [80] and  
606 further developed in [76], the theory of hierarchical predictive processing [81], and the predictive functions  
607 proposed for the dorsal auditory pathway [82, 83], we propose a neural implementation of PIPPET’s phase  
608 estimation in Figure 8. An essential aspect of this account is that it does not insist on the mathematical  
609 convenience of instantaneous phase updates, which are obviously implausible in the brain. Instead, precise  
610 timing predictions are issued with appropriate timing to intercept rising sensory signals, and the resulting  
611 timing errors are then be used to update phase through an error minimization process over the next few  
612 hundred milliseconds.

613 Briefly, phase is represented by stereotyped trajectories of population firing rates in MPC, and phase  
614 uncertainty is also represented locally in medial frontal cortex [72]. Basal ganglia selects and activates  
615 an expectation template appropriate to the context. This template is combined with phase and phase  
616 uncertainty estimates in MPC to compute a momentary subjective hazard rate  $\Lambda$ . The hazard rate is sent  
617 to parietal cortex as a prediction of event-based input, where it meets ascending pulses from the auditory  
618 system associated with auditory events (which may be relayed rapidly from the dorsal cochlear nucleus via  
619 cerebellum [19]). “Event prediction error” from parietal cortex returns to MPC, where it pushes  $\mu$  in the  
620 direction that reduces error: toward expected event phases at events and away from them between events.

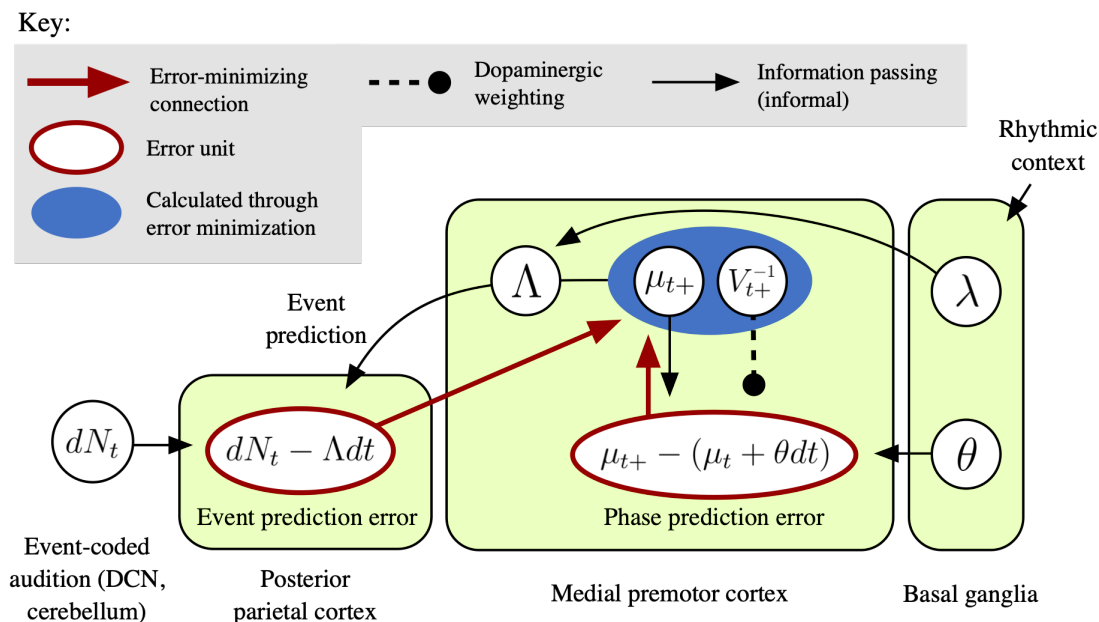

Figure 8: **A possible implementation of PIPPET in the brain.** This diagram embeds a formal predictive coding error minimization scheme within an informal information-passing schematic to outline how estimated phase  $\mu_t$  might be calculated and updated on each  $dt$  time step by a network of interacting brain regions. Estimated phase  $\mu_t$  and phase uncertainty  $V_t$  are represented in medial premotor cortex (MPC). These estimates are used to calculate instantaneous subjective hazard rate  $\Lambda$  with the help of basal ganglia, which has selected an expectation template  $\lambda$  based on recent rhythmic context. The hazard rate is sent to parietal cortex, where it acts as a prediction of pulses rising from the event-based auditory pathway. An “event prediction error” signal comparing pulses to their prediction is sent back up to MPC, where it pushes  $\mu_{t+}$  in the direction that reduces prediction error – strongly toward local expectancy peaks when events occur, and weakly away from them when there are no events. (Note that phase updating at events is assumed to be rapid but not instantaneous as represented in the PIPPET filter.) The event prediction error is counterbalanced by a local “phase prediction error” signal generated through local interactions within MPC that pushes  $\mu_{t+}$  to continue its steady forward progress. Phase prediction error is weighted by dopaminergic signaling of state precision  $V_t^{-1}$  through VTA.

621 This influence is opposed by a “phase prediction error” signal within MPC that pulls  $\mu$  to progress steadily  
 622 at tempo  $\theta$ . This error signal is weighted by phase precision  $V^{-1}$ .

623 Note that this is not a full, formal error-minimization scheme for implementing PIPPET, which is beyond  
 624 the scope of this manuscript. In particular, it leaves out an updating scheme for  $V$ ; see [84] for a discussion  
 625 of the neurophysiology of precision updating. Further, it does not yet include an appropriate scheme for  
 626 weighting event prediction error.

627 Although it would be difficult to directly test this neurophysiological setting of PIPPET in humans,  
 628 it may be possible to indirectly observe a PIPPET-like process in neural data. At the scalp level and in  
 629 intracortical electrodes, slow electrical oscillations do seem to anticipatorily track the structure of periodic  
 630 auditory stimuli [85, 86], and this tracking is associated with the subjective passage of time [87]; these  
 631 oscillations could be explored as possible estimates of mean underlying phase, with particular focus on those

632 in motor areas. Ideally, timing prediction errors could be observed in the evoked EEG response to events  
 633 (the ERP), allowing a direct measurement of event expectancy at each event time, and there are indeed  
 634 indicators that the ERP is sensitive to temporal predictability (e.g., [88, 89]); however, the sensitivity of the  
 635 ERP to recent stimulus history makes this approach unpromising. However, timing prediction errors may be  
 636 observable in EEG/MEG through their effect on gamma oscillations [90, 91]. Further, the subjective hazard  
 637 rate  $\Lambda$  itself may be observable by using techniques recently applied to decode the temporal hazard function  
 638 from EEG data [92], or through its correlation with beta oscillations [93].

639 Although human-like beat-based perceptual and audio-motor entrainment seems to be unique to humans,  
 640 other primates do show rudimentary rhythmic timing abilities, especially in the visual modality [94], and  
 641 represent phase of self-generated cyclic behavioral processes in MPC [79, 78]. Experimental paradigms  
 642 appropriately modified to engage mechanisms of self-action tracking might activate in non-human primates  
 643 the same mechanisms of uncertainty-informed event-timing-based phase tracking that we hypothesize for  
 644 auditory rhythm tracking in humans. Thus, primate neurophysiology in MPC and the dopaminergic system  
 645 may be a promising avenue for indirectly testing the phase inference framework as a description of the human  
 646 faculty of rhythmic entrainment.

## 647 5 Acknowledgments

648 Thanks to Tom Kaplan for extensive discussions and key insights motivating this manuscript, and to  
 649 Aniruddh Patel, Darren Rhodes, and Nori Jacoby for helpful feedback.

## 650 6 Appendix

### 651 6.1 The PATIPPET filter

652 We let  $\boldsymbol{\mu} = \begin{pmatrix} \bar{\phi} \\ \bar{\theta} \end{pmatrix}$  denote the posterior mean and  $\mathbf{V} = \begin{pmatrix} V^{11} & V^{12} \\ V^{21} & V^{22} \end{pmatrix}$  denote the posterior covariance. The  
 653 expressions for the evolution of the PATIPPET filter, which we derive in the following section, are:

$$\begin{cases} d\boldsymbol{\mu} = \begin{pmatrix} \bar{\theta} \\ 0 \end{pmatrix} dt + (\hat{\boldsymbol{\mu}} - \boldsymbol{\mu}_t) \cdot (dN_t - \Lambda dt) \\ d\mathbf{V} = \begin{pmatrix} 2V^{12} + \sigma^2 & V^{22} \\ V^{22} & \sigma_{\bar{\theta}}^2 \end{pmatrix} dt + (\hat{\mathbf{V}} - \mathbf{V}_t) \cdot (dN_t - \Lambda dt) \end{cases} \quad (9)$$

654 where we define

$$\left\{ \begin{array}{l} \Lambda := \sum_{i=0,1,\dots} \Lambda_i \hat{\theta}_i \\ \hat{\boldsymbol{\mu}} = \frac{1}{\Lambda} \sum_{i=0,1,\dots} \Lambda_i \begin{pmatrix} K_i^{12} + \hat{\phi}_i \hat{\theta}_i \\ K_i^{22} + \hat{\theta}_i^2 \end{pmatrix} \\ \hat{\mathbf{V}} := \frac{1}{\Lambda} \sum_{i=0,1,\dots} \Lambda_i \left( \hat{\theta}_i \mathbf{K}_i + \hat{\theta}_i (\hat{\boldsymbol{\mu}}_i - \boldsymbol{\mu}_{t+}) (\hat{\boldsymbol{\mu}}_i - \boldsymbol{\mu}_{t+})^T \right. \\ \left. + (\hat{\boldsymbol{\mu}}_i - \boldsymbol{\mu}_{t+}) \begin{pmatrix} K_i^{21} & K_i^{22} \end{pmatrix} + \begin{pmatrix} K_i^{12} \\ K_i^{22} \end{pmatrix} (\hat{\boldsymbol{\mu}}_i - \boldsymbol{\mu}_{t+})^T \right) \end{array} \right. \quad (10)$$

655 and where

$$656 \quad \mathbf{K}_0 := \mathbf{V}, \mathbf{K}_i := (\mathbf{P}_i + \mathbf{V}^{-1})^{-1} \text{ for } i > 0.$$

657  $K_i^{kl}$  denotes the entries in  $\mathbf{K}_i$ .

$$658 \quad \Lambda_0 := \lambda_0, \Lambda_i := \lambda_i \varphi(\phi_i | \bar{\phi}, v_i^{-1} + (V^{11})^{-1}) \text{ for } i > 0.$$

$$659 \quad \hat{\boldsymbol{\mu}}_i = \begin{pmatrix} \hat{\phi}_i \\ \hat{\theta}_i \end{pmatrix} := \mathbf{K}_i \begin{pmatrix} v_i^{-1} \phi_i \\ 0 \end{pmatrix} + \mathbf{V}^{-1} \boldsymbol{\mu} \text{ for } i > 0, \text{ and } \hat{\boldsymbol{\mu}}_0 := \boldsymbol{\mu}.$$

$$660 \quad \mathbf{P}_i := \begin{pmatrix} v_i^{-1} & 0 \\ 0 & 0 \end{pmatrix}$$

## 661 6.2 Derivation of differential equations and update equations.

662 Here we derive the PATIPPET filter; the PIPPET filter can be derived similarly or as a special case of  
663 PATIPPET.

664 Snyder [23] provides a partial differential equation describing the evolution of a probability distribution on  
665 a continuously stochastically evolving state that drives the emission of point process events. If the evolution  
666 of the underlying state is described by a Gauss-Markov diffusion process:

$$d\mathbf{x} = \mathbf{A}\mathbf{x}dt + \mathbf{B}d\mathbf{W}_t \quad (11)$$

667 and events are generated at rate  $\lambda(\mathbf{x})$ , then the evolution of the probability distribution  $p_t(\mathbf{x})$  is described  
668 by

$$dp_t(\mathbf{x}) = \mathcal{L}[p_t(\mathbf{x})]dt + p_t(\mathbf{x}) \left( \frac{\lambda(\mathbf{x})}{\Lambda} - 1 \right) \cdot (dN_t - \Lambda dt) \quad (12)$$

669 where  $\Lambda := \mathbb{E}[\lambda(\mathbf{x})]$  (with  $\mathbb{E}$  denoting expectation under distribution  $p_t(\mathbf{x})$ ),  $dN_t$  is the increment in the  
670 event count over each  $dt$  time step (assumed to be either 1 or 0 with probability 1), and  $\mathcal{L}$  is the Kolmogorov

671 forward operator associated with (11):

$$\mathcal{L}[p(\mathbf{x})] = - \sum_i \frac{\partial}{\partial x_i} [\mathbf{A}\mathbf{x}]_i p(\mathbf{x}) + \frac{1}{2} \sum_{i,j} \frac{\partial^2}{\partial x_i \partial x_j} [\mathbf{B}\mathbf{B}^T]_{ij} p(\mathbf{x}) \quad (13)$$

Here we project  $p$  onto a Gaussian distribution at each time step by matching mean  $\boldsymbol{\mu}$  and covariance  $\mathbf{V}$ , which is also the projection with minimal KL divergence. We do this by finding the differentials of these moments of  $p_t$  and using them to drive the evolution of these two variables:

$$\begin{aligned} d\boldsymbol{\mu}_t &= \boldsymbol{\mu}_{t+} - \boldsymbol{\mu}_t = \int_{\mathbf{x}} \mathbf{x} p_{t+}(\mathbf{x}) d\mathbf{x} - \int_{\mathbf{x}} \mathbf{x} p_t(\mathbf{x}) d\mathbf{x} \\ &= \int_{\mathbf{x}} \mathbf{x} (p_{t+}(\mathbf{x}) - p_t(\mathbf{x})) d\mathbf{x} = \int_{\mathbf{x}} \mathbf{x} dp_t(\mathbf{x}) d\mathbf{x} \\ &= \int_{\mathbf{x}} \mathbf{x} \mathcal{L}[p_t(\mathbf{x})] dt d\mathbf{x} + (\hat{\boldsymbol{\mu}} - \boldsymbol{\mu}_t) \cdot (dN_t - \Lambda dt) \end{aligned} \quad (14)$$

where we define  $\hat{\boldsymbol{\mu}} := \mathbb{E}[\mathbf{x}\lambda(\mathbf{x})]$ , and

$$d\mathbf{V}_t = \mathbf{V}_{t+} - \mathbf{V}_t = \int_{\mathbf{x}} [[\mathbf{x} - \boldsymbol{\mu}_{t+}]^2] p_{t+}(\mathbf{x}) d\mathbf{x} - \int_{\mathbf{x}} [[\mathbf{x} - \boldsymbol{\mu}_t]^2] p_t(\mathbf{x}) d\mathbf{x}$$

where  $[[\mathbf{x}]]^2$  denotes  $\mathbf{x}\mathbf{x}^T$ .

$$\begin{aligned} d\mathbf{V}_t &= \int_{\mathbf{x}} [[\mathbf{x} - \boldsymbol{\mu}_{t+}]^2] (p_{t+}(\mathbf{x}) - p_t(\mathbf{x})) d\mathbf{x} \\ &\quad + \int_{\mathbf{x}} ([[\mathbf{x} - \boldsymbol{\mu}_{t+}]^2] - [[\mathbf{x} - \boldsymbol{\mu}_t]^2]) p_t(\mathbf{x}) d\mathbf{x} \\ &= \int_{\mathbf{x}} [[\mathbf{x} - \boldsymbol{\mu}_{t+}]^2] dp_t(\mathbf{x}) - [[\boldsymbol{\mu}_{t+} - \boldsymbol{\mu}_t]^2] \\ &= \int_{\mathbf{x}} [[\mathbf{x} - \boldsymbol{\mu}_{t+}]^2] \mathcal{L}[p_t(\mathbf{x}|N_t)] dt d\mathbf{x} + (\hat{\mathbf{V}} - \mathbf{V}_t) \cdot (dN_t - \Lambda dt) \end{aligned} \quad (15)$$

672 where we define  $\hat{\mathbf{V}} := \mathbb{E}[[[\mathbf{x} - \boldsymbol{\mu}_{t+}]^2]\lambda(\mathbf{x})]$ .

673 Integrating by parts (or following [26]), we can calculate the appropriate integrals of  $\mathcal{L}[p_t(\mathbf{x}|N_t)]$ , arriving  
674 at a general expression for the variational Bayesian filter for point process data:

$$\begin{cases} d\boldsymbol{\mu}_t = \mathbf{A}\boldsymbol{\mu}_t dt + (\hat{\boldsymbol{\mu}} - \boldsymbol{\mu}_t) \cdot (dN_t - \Lambda dt) \\ d\mathbf{V}_t = (\mathbf{A}\mathbf{V}_t + \mathbf{V}_t\mathbf{A}^T + \mathbf{B}\mathbf{B}^T) dt + (\hat{\mathbf{V}} - \mathbf{V}_t) \cdot (dN_t - \Lambda dt) \end{cases} \quad (16)$$



675 From (4), the PATIPPET generative model is described by the Gauss-Markov diffusion process (11) with

$$\mathbf{x} = \begin{pmatrix} \phi \\ \theta \end{pmatrix} \text{ and } \boldsymbol{\mu} = \begin{pmatrix} \bar{\phi} \\ \bar{\theta} \end{pmatrix}$$

676

$$\mathbf{V} = \begin{pmatrix} V^{11} & V^{12} \\ V^{21} & V^{22} \end{pmatrix}$$

677

$$\mathbf{A} := \begin{pmatrix} 0 & 1 \\ 0 & 0 \end{pmatrix} \text{ and } \mathbf{B} := \begin{pmatrix} \sigma & 0 \\ 0 & \sigma_\theta \end{pmatrix}.$$

678 Plugging into (16), we have

$$\begin{cases} d\boldsymbol{\mu}_t = \begin{pmatrix} \bar{\theta} \\ 0 \end{pmatrix} dt + (\hat{\boldsymbol{\mu}} - \boldsymbol{\mu}_t) \cdot (dN_t - \Lambda dt) \\ d\mathbf{V} = \begin{pmatrix} 2V^{12} + \sigma^2 & V^{22} \\ V^{22} & \sigma_\theta^2 \end{pmatrix} dt + (\hat{\mathbf{V}} - \mathbf{V}_t) \cdot (dN_t - \Lambda dt) \end{cases} \quad (17)$$

679 We complete the derivation by calculating  $\Lambda$ ,  $\hat{\boldsymbol{\mu}}$ , and  $\hat{\mathbf{V}}$ . This proceeds by first deriving a simple expression  
680 for  $p(\mathbf{x})\lambda(\mathbf{x})$  as a sum of scaled normal distributions.

681 Let  $\|x\|_A^2$  denote  $x^T A x$ . We will make use of the following result, a generalized form of a well-known  
682 result about quadratic forms that allows us to write products of multivariate normal distributions as normal  
683 distributions (see [95] for proof and similar application):

$$\|x - a\|_A^2 + \|x - b\|_B^2 = \|a - b\|_{A(A+B)^{-1}B}^2 + \|x - (A+B)^{-1}(Aa+Bb)\|_{A+B}^2 \quad (18)$$

684 In the PATIPPET generative model, events are generated at rate

$$\lambda(\mathbf{x}) = \theta \left( \lambda_0 + \sum_{i=1,2,\dots} \frac{\lambda_i}{\sqrt{2\pi v_i}} e^{-\frac{1}{2}\|\mathbf{x}-\mathbf{x}_i\|_{\mathbf{P}_i}^2} \right)$$

685

$$\mathbf{P}_i = \begin{pmatrix} v_i^{-1} & 0 \\ 0 & 0 \end{pmatrix}, \mathbf{x}_i = \begin{pmatrix} \phi_i \\ 0 \end{pmatrix}.$$

686  $p(\mathbf{x})$  is assumed (forced) to be Gaussian, so we can write:

$$p(\mathbf{x}) = \frac{1}{\sqrt{2\pi|\mathbf{V}|}} e^{-\frac{1}{2}\|\mathbf{x}-\boldsymbol{\mu}\|_{\mathbf{V}^{-1}}^2}.$$

We calculate:

$$\begin{aligned} p(\mathbf{x})\lambda(\mathbf{x}) &= \frac{\theta}{\sqrt{2\pi|\mathbf{V}|}} e^{-\frac{1}{2}\|\mathbf{x}-\boldsymbol{\mu}\|_{\mathbf{V}^{-1}}^2} \left( \lambda_0 + \sum_{i=1,2,\dots} \frac{\lambda_i}{\sqrt{2\pi v_i}} e^{-\frac{1}{2}\|\mathbf{x}-\mathbf{x}_i\|_{\mathbf{P}_i}^2} \right) \\ &= \frac{\lambda_0\theta}{\sqrt{2\pi|\mathbf{V}|}} e^{-\frac{1}{2}\|\mathbf{x}-\boldsymbol{\mu}\|_{\mathbf{V}^{-1}}^2} + \theta \sum_{i=1,2,\dots} \frac{\lambda_i}{2\pi\sqrt{v_i|\mathbf{V}|}} e^{-\frac{1}{2}\|\mathbf{x}-\mathbf{x}_i\|_{\mathbf{P}_i}^2 - \frac{1}{2}\|\mathbf{x}-\boldsymbol{\mu}\|_{\mathbf{V}^{-1}}^2} \end{aligned}$$

Applying (18),

$$\begin{aligned} p(\mathbf{x})\lambda(\mathbf{x}) &= \frac{\lambda_0\theta}{\sqrt{2\pi|\mathbf{V}|}} e^{-\frac{1}{2}\|\mathbf{x}-\boldsymbol{\mu}\|_{\mathbf{V}^{-1}}^2} \\ &\quad + \theta \sum_{i=1,2,\dots} \lambda_i \left( \frac{1}{\sqrt{2\pi(v_i^{-1} + V^{-1})}} e^{-\frac{1}{2}\|\mathbf{x}_i - \boldsymbol{\mu}\|_{\mathbf{P}_i\mathbf{K}_i(\mathbf{V}^{-1})}^2} \right) \left( \frac{1}{\sqrt{2\pi\frac{v_i|\mathbf{V}|}{v_i^{-1} + (\mathbf{V}^{-1})^{-1}}}} e^{-\frac{1}{2}\|\mathbf{x} - \mathbf{K}_i(\mathbf{P}_i\mathbf{x}_i + \mathbf{V}^{-1}\boldsymbol{\mu})\|_{\mathbf{K}_i^{-1}}^2} \right) \end{aligned} \quad (19)$$

where we define  $\mathbf{K}_i := (\mathbf{P}_i + \mathbf{V}^{-1})^{-1}$ . These two final terms are both expressions for normal distributions, so we can rewrite (19) as

$$p(\mathbf{x})\lambda(\mathbf{x}) = \lambda_0\theta\varphi(\mathbf{x}|\boldsymbol{\mu}, \mathbf{V}) + \theta \sum_{i=1,2,\dots} \lambda_i\varphi(\phi_i|\bar{\phi}, v_i^{-1} + (V^{11})^{-1})\varphi(\mathbf{x}|\mathbf{K}_i(\mathbf{P}_i\mathbf{x}_i + \mathbf{V}^{-1}\boldsymbol{\mu}), \mathbf{K}_i) \quad (20)$$

We simplify this expression by defining  $\Lambda_i := \lambda_i\varphi(\phi_i|\bar{\phi}, v_i^{-1} + (V^{11})^{-1})$  for  $i > 0$ , and setting  $\Lambda_0 := \lambda_0$  and  $\mathbf{K}_0 = \mathbf{V}$ . We define  $\hat{\boldsymbol{\mu}}_i := \begin{pmatrix} \hat{\phi}_i \\ \hat{\theta}_i \end{pmatrix} := \mathbf{K}_i(\mathbf{P}_i\mathbf{x}_i + \mathbf{V}^{-1}\boldsymbol{\mu})$  for  $i > 0$  and set  $\hat{\boldsymbol{\mu}}_0 := \boldsymbol{\mu}$ . This lets us write

$$p(\mathbf{x})\lambda(\mathbf{x}) = \sum_{i=0,1,\dots} \Lambda_i\theta\varphi(\mathbf{x}|\hat{\boldsymbol{\mu}}_i, \mathbf{K}_i) \quad (21)$$

We use this expression and the moments of normal distributions to calculate  $\Lambda$ ,  $\hat{\boldsymbol{\mu}}$ , and  $\hat{\mathbf{V}}$ :

$$\begin{aligned} \Lambda &:= \mathbb{E}_p[\lambda(\mathbf{x})] = \sum_{i=0,1,\dots} \Lambda_i \int \theta\varphi(\mathbf{x}|\hat{\boldsymbol{\mu}}_i, \mathbf{K}_i) d\mathbf{x} = \sum_{i=0,1,\dots} \Lambda_i \hat{\theta}_i \\ \hat{\boldsymbol{\mu}} &:= \frac{1}{\Lambda} \mathbb{E}[\mathbf{x}\lambda(\mathbf{x})] = \frac{1}{\Lambda} \sum_{i=0,1,\dots} \Lambda_i \int \begin{pmatrix} \phi\theta \\ \theta^2 \end{pmatrix} \varphi(\mathbf{x}|\hat{\boldsymbol{\mu}}_i, \mathbf{K}_i) d\mathbf{x} \end{aligned} \quad (22)$$

This expression picks out non-central second moment terms of each normal distributions in (21), each of which can be written in terms of the covariance matrix and mean of the distribution. Using  $K_i^{kl}$  to denote the entries in  $\mathbf{K}_i$ , we can write

$$\hat{\boldsymbol{\mu}} = \frac{1}{\Lambda} \sum_{i=0,1,\dots} \Lambda_i \begin{pmatrix} K_i^{12} + \hat{\phi}_i \hat{\theta}_i \\ K_i^{22} + \hat{\theta}_i^2 \end{pmatrix} \quad (23)$$

The third-order expression for  $\hat{\mathbf{V}}$  can also be written in terms of covariance matrices and means since the central third moments of normal distributions are zero.

$$\begin{aligned} \hat{\mathbf{V}} &:= \frac{1}{\Lambda} \mathbb{E}_p [[\mathbf{x} - \boldsymbol{\mu}_{t+}]^2 \lambda(\mathbf{x})] \\ &= \frac{1}{\Lambda} \sum_{i=0,1,\dots} \Lambda_i \int [[\mathbf{x} - \boldsymbol{\mu}_{t+}]^2 \theta \varphi(\mathbf{x} | \hat{\boldsymbol{\mu}}_i, \mathbf{K}_i) d\mathbf{x}] \\ &= \sum_{i=0,1,\dots} \Lambda_i \left[ \hat{\theta}_i \int [[\mathbf{x} - \hat{\boldsymbol{\mu}}_i]^2 \varphi(\mathbf{x} | \hat{\boldsymbol{\mu}}_i, \mathbf{K}_i) d\mathbf{x} \dots \right. \\ &\quad \left. + \hat{\theta}_i [[\hat{\boldsymbol{\mu}}_i - \boldsymbol{\mu}_{t+}]^2 \dots \right. \\ &\quad \left. + (\hat{\boldsymbol{\mu}}_i - \boldsymbol{\mu}_{t+}) \int (\mathbf{x} - \hat{\boldsymbol{\mu}}_i)^T (\theta - \hat{\theta}_i) \varphi(\mathbf{x} | \hat{\boldsymbol{\mu}}_i, \mathbf{K}_i) d\mathbf{x} \dots \right. \\ &\quad \left. + \left( \int (\mathbf{x} - \hat{\boldsymbol{\mu}}_i) (\theta - \hat{\theta}_i) \varphi(\mathbf{x} | \hat{\boldsymbol{\mu}}_i, \mathbf{K}_i) d\mathbf{x} \right) (\hat{\boldsymbol{\mu}}_i - \boldsymbol{\mu}_{t+})^T \right] \\ &= \frac{1}{\Lambda} \sum_{i=0,1,\dots} \Lambda_i [\hat{\theta}_i \mathbf{K}_i + \hat{\theta}_i [[\hat{\boldsymbol{\mu}}_i - \boldsymbol{\mu}_{t+}]^2 \dots \right. \\ &\quad \left. + (\hat{\boldsymbol{\mu}}_i - \boldsymbol{\mu}_{t+}) \begin{pmatrix} K_i^{21} & K_i^{22} \end{pmatrix} + \begin{pmatrix} K_i^{12} \\ K_i^{22} \end{pmatrix} (\hat{\boldsymbol{\mu}}_i - \boldsymbol{\mu}_{t+})^T] \end{aligned} \quad (24)$$

687 Expressions (22), (23), and (24) coupled with (17) constitute the PATIPPET filter.

688 The PIPPET filter can be derived as a special case of the PATIPPET filter by setting  $\sigma_\theta = 0$ ,  $\theta_0 = 1$ , and  
689 all terms in  $\mathbf{V}$  to zero except  $V$ . However, this requires finessing various degeneracies, e.g. wherever  $\mathbf{V}$  is  
690 inverted. More straightforward is to follow the same process as above, starting from the PIPPET generative  
691 model (1) and (2). Either way ultimately yields the PIPPET filter (3).

692 For multiple event streams  $j$ ,

$$dp_t(\mathbf{x}) = \mathcal{L}[p_t(\mathbf{x})] dt + p_t(\mathbf{x}) \sum_j (\lambda_j(\mathbf{x}) - \mathbb{E}_p[\lambda_j(\mathbf{x})]) \cdot (\mathbb{E}_p[\lambda_j(\mathbf{x})]^{-1} dN_j - dt) \quad (25)$$

693 This follows directly from application of the derivation above to equation (5) in [96] with a discrete spatial  
694 dimension. By the methods above, it yields the mPIPPET filter (8) and the mPATIPPET filter:

$$\begin{cases} d\boldsymbol{\mu}_t = \begin{pmatrix} \bar{\theta} \\ 0 \end{pmatrix} dt + \sum_j (\hat{\boldsymbol{\mu}}^j - \boldsymbol{\mu}_t) \cdot (dN_t^j - \Lambda^j dt) \\ d\mathbf{V} = \begin{pmatrix} 2V^{12} + \sigma^2 & V^{22} \\ V^{22} & \sigma_{\theta}^2 \end{pmatrix} dt + \sum_j (\hat{\mathbf{V}}^j - \mathbf{V}_t) \cdot (dN_t^j - \Lambda^j dt) \end{cases} \quad (26)$$

### 6.3 Simulation parameters.

All code used to create figures in this manuscript is available at <https://github.com/joncannon/PIPPET>.

PIPPET simulations were conducted by numerical simulation of (3) with  $dt = .001$  and initialized with  $\phi_0 = 0$  and  $V_0 = .0002$ . Parameters for the simulations shown in each figure are listed below, with  $t_n$  used to denote simulated event times (in units of seconds).

*Figure 2:*  $\phi_1 = .5$ ,  $v_1 = .0005$ ,  $\lambda_1 = 1$ ,  $\mu_t = .43$ ,  $V_t = .001$ ,  $\lambda_0 = 0$  or  $.5$ , except as otherwise specified.

*Figure 3A:*

$$\{t_n\} = \{0, .150, .5, .75, .9, 1.25\}$$

$$\{\phi_i\} = \{0, .15, .25, .4, .5, .65, .75, .9, 1, 1.15, 1.25, 1.4\}$$

$$\{v_i\} = \{.0001, .0005, .0001, .0005, .0001, .0005, .0001, .0005, .0001, .0005\}$$

$$\{\lambda_i\} = \{.05, .01, .05, .01, .05, .01, .05, .01, .05, .01\}$$

$$\lambda_0 = .01$$

$$\sigma = .05$$

*Figure 3B:* Same as Figure 3A, but with  $t_3 = .45$  (50 ms negative event time shift).

*Figure 3C:* Same as Figure 3A, but with  $\{t_n\} = \{0, .15, .5, .7, .85, 1.2\}$  (50 ms negative phase shift).

*Figure 4A:* Same as Figure 3, but with  $\{t_n\} = \{0, .150, .65, .9, 1.15, 1.25\}$ .

*Figure 4B:* Same as Figure 4A, but with  $\sigma = .3$ .

Figure 4A: Same as Figure 4A, but with additional tap times and tap feedback expectations:

$$\{t_n^{tap}\} = \{\phi_i^{tap}\} = \{0, .5, 1\}$$

$$v_i^{tap} = .0005$$

$$\lambda_i^{tap} = .05$$

$$\lambda_0^{tap} = .01$$

705 PATIPPET simulations were conducted by numerical simulation of (4) with  $dt = .001$ . Parameters for  
706 the simulations shown in each figure are listed below.

Figure 5:

$$t_n = \frac{n}{1.2Hz}$$

$$\phi_i = i$$

$$v_i = .005$$

$$\lambda_i = .02$$

$$\lambda_0 = .0001$$

$$\sigma = .05$$

$$\sigma_\theta = .05$$

$$\boldsymbol{\mu}_0 = \begin{pmatrix} 0 \\ 1 \end{pmatrix}$$

$$\mathbf{V}_0 = \begin{pmatrix} .001 & 0 \\ 0 & .04 \end{pmatrix}$$

Figure 6: In four simulations, we set the inter-onset interval  $\Delta$  to .4s, 0.7s, 1.0s, and 1.3s. In each

simulation, we set the perturbation  $\delta$  to  $\frac{\Delta}{25}$ .

$$\{t_n\} = \{\Delta, 2\Delta, 3\Delta, 4\Delta + \delta\}$$

$$\phi_i = i$$

$$v_i = .0002$$

$$\lambda_i = .02$$

$$\lambda_0 = 10^{-5}$$

$$\sigma = .01$$

$$\sigma_\theta = .01$$

$$\boldsymbol{\mu}_0 = \begin{pmatrix} 0 \\ 1 \end{pmatrix}$$

$$\mathbf{V}_0 = \begin{pmatrix} 10^{-4} & 0 \\ 0 & 10^{-4} \end{pmatrix}$$

Figure 7A:

$$\phi_i = .25i$$

$$v_i = .0001$$

$$\lambda_i = 1$$

$$\lambda_0 = .0001$$

$$\sigma = .015$$

$$\sigma_\theta = .2$$

$$\boldsymbol{\mu}_0 = \begin{pmatrix} 0 \\ 1 \end{pmatrix}$$

$$\mathbf{V}_0 = \begin{pmatrix} .0001 & 0 \\ 0 & .005 \end{pmatrix}$$

707 Left:  $\{t_n\} = \{.25, .5, .75, 1\}$ . Right:  $\{t_n\} = \{1\}$ .

708 Figure 7B: Same as Figure 7A, but with  $\lambda_i = 0$  and  $\lambda_0 = 4$ .

## 709 References

- 710 1. Repp BH and Su YH. Sensorimotor synchronization: A review of recent research (2006-2012). *Psychonomic Bulletin and Review* 2013; 20:403–52. DOI: 10.3758/s13423-012-0371-2. arXiv: NIHMS150003
- 711 2. Merchant H, Grahm J, Trainor L, Rohrmeier M, and Fitch WT. Finding the beat: a neural perspective
- 712 across humans and non-human primates. *Philosophical transactions of the Royal Society of London.*
- 713 *Series B, Biological sciences* 2015; 370. DOI: 10.1098/rstb.2014.0093. Available from: [http :](http://www.ncbi.nlm.nih.gov/pubmed/25646516)
- 714 [//www.ncbi.nlm.nih.gov/pubmed/25646516](http://www.ncbi.nlm.nih.gov/pubmed/25646516)
- 715 3. Obleser J and Kayser C. Neural Entrainment and Attentional Selection in the Listening Brain. *Trends*
- 716 *in Cognitive Sciences* 2019; 23:1–14. DOI: 10.1016/j.tics.2019.08.004. Available from: [https :](https://doi.org/10.1016/j.tics.2019.08.004)
- 717 [//doi.org/10.1016/j.tics.2019.08.004](https://doi.org/10.1016/j.tics.2019.08.004)
- 718 4. Lawrance ELA, Harper NS, Cooke JE, and Schnupp JWH. Temporal predictability enhances auditory
- 719 detection. *The Journal of the Acoustical Society of America* 2014; 135:EL357–EL363. DOI: 10.1121/
- 720 1.4879667. Available from: <http://dx.doi.org/10.1121/1.4879667>
- 721 5. Nobre AC and Van Ede F. Anticipated moments: Temporal structure in attention. *Nature Reviews*
- 722 *Neuroscience* 2018; 19:34–48. DOI: 10.1038/nrn.2017.141. Available from: [http://dx.doi.org/10.](http://dx.doi.org/10.1038/nrn.2017.141)
- 723 [1038/nrn.2017.141](http://dx.doi.org/10.1038/nrn.2017.141)
- 724 6. Morillon B, Schroeder CE, Wyart V, and Arnal LH. Temporal prediction in lieu of periodic stimulation.
- 725 *Journal of Neuroscience* 2016; 36:2342–7. DOI: 10.1523/JNEUROSCI.0836-15.2016
- 726 7. Lange K. Brain correlates of early auditory processing are attenuated by expectations for time and
- 727 pitch. *Brain and Cognition* 2009; 69:127–37. DOI: 10.1016/j.bandc.2008.06.004. Available from:
- 728 <http://dx.doi.org/10.1016/j.bandc.2008.06.004>
- 729 8. Jazayeri M and Shadlen MN. Temporal context calibrates interval timing. *Nature Neuroscience* 2010;
- 730 13:1020–6. DOI: 10.1038/nn.2590
- 731 9. Herrmann B, Henry MJ, Haegens S, and Obleser J. Temporal expectations and neural amplitude
- 732 fluctuations in auditory cortex interactively influence perception. *NeuroImage* 2016; 124:487–97. DOI:
- 733 10.1016/j.neuroimage.2015.09.019
- 734 10. Rajendran VG, Teki S, and Schnupp JW. Temporal Processing in Audition: Insights from Music.
- 735 *Neuroscience* 2018; 389:4–18. DOI: 10.1016/j.neuroscience.2017.10.041. Available from: [https :](https://doi.org/10.1016/j.neuroscience.2017.10.041)
- 736 [//doi.org/10.1016/j.neuroscience.2017.10.041](https://doi.org/10.1016/j.neuroscience.2017.10.041)
- 737 11. Large EW and Jones MR. The dynamics of attending: How people track time-varying events. *Psycho-*
- 738 *logical Review* 1999; 106:119–59. DOI: 10.1037//0033-295x.106.1.119
- 739

- 740 12. Large EW and Palmer C. Perceiving temporal regularity in music. *Cognitive Science* 2002; 26:1–37.  
741 DOI: 10.1016/S0364-0213(01)00057-X
- 742 13. Friston K. A theory of cortical responses. *Philosophical Transactions of the Royal Society B: Biological*  
743 *Sciences* 2005; 360:815–36. DOI: 10.1098/rstb.2005.1622
- 744 14. Vuust P and Witek MA. Rhythmic complexity and predictive coding: A novel approach to modeling  
745 rhythm and meter perception in music. *Frontiers in Psychology* 2014; 5:1–14. DOI: 10.3389/fpsyg.  
746 2014.01111
- 747 15. Vuust P, Dietz MJ, Witek M, and Kringelbach ML. Now you hear it: A predictive coding model for  
748 understanding rhythmic incongruity. *Annals of the New York Academy of Sciences* 2018; 1423:19–29.  
749 DOI: 10.1111/nyas.13622
- 750 16. Proksch S, Comstock DC, Médé B, Pabst A, and Balasubramaniam R. Motor and Predictive Processes  
751 in Auditory Beat and Rhythm Perception. 2020; 14. DOI: 10.3389/fnhum.2020.578546
- 752 17. Friston K, Stephan K, Li B, and Daunizeau J. Generalised filtering. *Mathematical Problems in Engi-*  
753 *neering* 2010; 2010. DOI: 10.1155/2010/621670
- 754 18. Buckley CL, Kim CS, McGregor S, and Seth AK. The free energy principle for action and perception:  
755 A mathematical review. *Journal of Mathematical Psychology* 2017; 81:55–79. DOI: 10.1016/j.jmp.  
756 2017.09.004. arXiv: 1705.09156. Available from: <http://dx.doi.org/10.1016/j.jmp.2017.09.004>
- 757 19. Schwartze M and Kotz SA. A dual-pathway neural architecture for specific temporal prediction. *Neu-*  
758 *roscience and Biobehavioral Reviews* 2013; 37:2587–96. DOI: 10.1016/j.neubiorev.2013.08.005.  
759 Available from: <http://dx.doi.org/10.1016/j.neubiorev.2013.08.005>
- 760 20. Egger SW and Jazayeri M. A nonlinear updating algorithm captures suboptimal inference in the pres-  
761 ence of signal-dependent noise. *Scientific Reports* 2018 :18–20. DOI: 10.1038/s41598-018-30722-0
- 762 21. DI Luca M and Rhodes D. Optimal Perceived Timing: Integrating Sensory Information with Dynami-  
763 cally Updated Expectations. *Scientific Reports* 2016; 6:1–15. DOI: 10.1038/srep28563
- 764 22. Elliott MT, Wing AM, and Welchman AE. Moving in time: Bayesian causal inference explains movement  
765 coordination to auditory beats. *Proceedings of the Royal Society B: Biological Sciences* 2014; 281. DOI:  
766 10.1098/rspb.2014.0751
- 767 23. Snyder DL. Filtering and Detection for Doubly Stochastic Poisson Processes. *IEEE Transactions on*  
768 *Information Theory* 1972; 18:91–102. DOI: 10.1109/TIT.1972.1054756
- 769 24. Oppen M. A Bayesian Approach to On-line Learning. *On-Line Learning in Neural Networks* 2010  
770 :363–78. DOI: 10.1017/cbo9780511569920.017



- 771 25. Friston K. The free-energy principle: A unified brain theory? *Nature Reviews Neuroscience* 2010;  
772 11:127–38. DOI: 10.1038/nrn2787
- 773 26. Eden UT and Brown EN. Continuous-time filters for state estimation from point-process models of  
774 neural data. *Statistica Sinica* 2008; 18:1293–310
- 775 27. Cemgil AT, Kappen B, Desain P, and Honing H. On tempo tracking: Tempogram representation and  
776 Kalman filtering. *Journal of New Music Research* 2000; 29:259–73. DOI: 10.1080/09298210008565462
- 777 28. London J, Polak R, and Jacoby N. Rhythm histograms and musical meter: A corpus study of Malian  
778 percussion music. *Psychonomic Bulletin and Review* 2017; 24:474–80. DOI: 10.3758/s13423-016-  
779 1093-7
- 780 29. Polak R, London J, and Jacoby N. Both isochronous and non-isochronous metrical subdivision afford  
781 precise and stable ensemble entrainment: A corpus study of malian jembe drumming. *Frontiers in*  
782 *Neuroscience* 2016; 10:1–11. DOI: 10.3389/fnins.2016.00285
- 783 30. Friberg A and Sundström A. Swing Ratios and Ensemble Timing in Jazz Performance: Evidence for a  
784 Common Rhythmic Pattern. *Music Perception* 2002; 19:333–49. DOI: 10.1525/mp.2002.19.3.333
- 785 31. Warren RM and Gregory RL. An Auditory Analogue of the Visual Reversible Figure. *The American*  
786 *Journal of Psychology* 1958; 71:612–3
- 787 32. Fitch WT and Rosenfeld AJ. Perception and Production of Syncopated Rhythms. *Music Perception*  
788 2007; 25:43–58
- 789 33. Repp BH. Tapping in synchrony with a perturbed metronome: The phase correction response to small  
790 and large phase shifts as a function of tempo. *Journal of Motor Behavior* 2011; 43:213–27. DOI: 10.  
791 1080/00222895.2011.561377
- 792 34. Repp BH, Keller PE, and Jacoby N. Quantifying phase correction in sensorimotor synchronization:  
793 Empirical comparison of three paradigms. *Acta Psychologica* 2012; 139:281–90. DOI: 10.1016/j.  
794 actpsy.2011.11.002. Available from: <http://dx.doi.org/10.1016/j.actpsy.2011.11.002>
- 795 35. Hall GS and Jastrow J. Studies of Rhythm. *Mind* 1886 Jan; os-XI:55–62. DOI: 10.1093/mind/os-  
796 XI.41.55. eprint: [https://academic.oup.com/mind/article-pdf/os-XI/41/55/9358438/os-](https://academic.oup.com/mind/article-pdf/os-XI/41/55/9358438/os-XI_41_55.pdf)  
797 <https://doi.org/10.1093/mind/os-XI.41.55>
- 798 36. Nakaajima Y. A psychophysical investigation of divided time intervals shown by sound bursts. *Journal*  
799 *of the Acoustical Society of Japan* 1979; 35:145–51
- 800 37. Meumann E. Beiträge zur Psychologie des Zeitbewußtseins [contributions to the psychology of time  
801 consciousness]. *Philosophische Studien* 1896; 12:128–254

- 802 38. Grimm K. der einfluß der Zeitform auf die Wahrnehmung der Zeitdauer [the influence of time-form on  
803 the perception of duration]. *Zeitschrift für Psychologie* 1934; 132:104–32
- 804 39. Repp BH and Bruttomesso M. A filled duration illusion in music: Effects of metrical subdivision on  
805 the perception and production of beat tempo. *Advances in Cognitive Psychology* 2009; 5:114–34. DOI:  
806 10.2478/V10053-008-0071-7
- 807 40. Repp B and Jendoubi H. Flexibility of temporal expectations for triple subdivision of a beat. *Advances*  
808 *in Cognitive Psychology* 2009; 5:27–41. DOI: 10.2478/v10053-008-0063-7
- 809 41. Wohlschläger A and Koch R. Synchronization error: An error in time perception. *Rhythm perception*  
810 *and production*. Ed. by Desain P and Winsdor L. Swets:115–27
- 811 42. Wing AM and Kristofferson AB. Response delays and the timing of discrete motor responses. *Perception*  
812 *& Psychophysics* 1973; 14:5–12. DOI: 10.3758/BF03198607
- 813 43. Mates J. A model of synchronization of motor acts to a stimulus sequence - II. Stability analysis, error  
814 estimation and simulations. *Biological Cybernetics* 1994; 70:475–84. DOI: 10.1007/BF00203240
- 815 44. Breska A and Deouell LY. Neural mechanisms of rhythm-based temporal prediction: Delta phase-  
816 locking reflects temporal predictability but not rhythmic entrainment. *PLoS Biology* 2017; 15:1–30.  
817 DOI: 10.1371/journal.pbio.2001665
- 818 45. Bouwer FL, Honing H, and Slagter HA. Beat-based and memory-based temporal expectations in  
819 rhythm: similar perceptual effects, different underlying mechanisms. 2019; 8:55
- 820 46. Fox C, Rezek I, and Roberts S. Drum 'N' Bayes : on-Line Variational Inference for Beat Tracking  
821 and Rhythm Recognition. *International Computer Music Conference* 2007. DOI: 10.1016/j.chioco.  
822 2016.10.003
- 823 47. Pesek M, Leonardis A, and Marolt M. An Analysis of Rhythmic Patterns with Unsupervised Learning.  
824 *Applied Sciences* 2019. DOI: 10.3390/app10010178
- 825 48. Ma WJ and Jazayeri M. Neural coding of uncertainty and probability. *Annual Review of Neuroscience*  
826 2014; 37:205–20. DOI: 10.1146/annurev-neuro-071013-014017
- 827 49. Repp BH and Keller PE. Adaptation to tempo changes in sensorimotor synchronization: Effects of  
828 intention, attention, and awareness. *Quarterly Journal of Experimental Psychology Section A: Human*  
829 *Experimental Psychology* 2004; 57:499–521. DOI: 10.1080/02724980343000369
- 830 50. Danielsen A. Here, There, and Everywhere: three accounts of pulse in D'Angelo's 'Left and Right'.  
831 2010 Jan :19–36. DOI: 10.4324/9781315596983-2

- 832 51. Witek MA, Clarke EF, Kringelbach ML, and Vuust P. Effects of Polyphonic Context, Instrumentation,  
833 and Metrical Location on Syncopation in Music. *Music Perception* 2014; 32:201–17
- 834 52. Rauschecker JP. Where, When, and How: Are they all sensorimotor? Towards a unified view of the  
835 dorsal pathway in vision and audition. *Cortex* 2018; 98:262–8. DOI: 10.1016/j.cortex.2017.10.020.  
836 Available from: <https://doi.org/10.1016/j.cortex.2017.10.020>
- 837 53. Comstock DC, Hove MJ, and Balasubramaniam R. Sensorimotor synchronization with auditory and  
838 visual modalities: Behavioral and neural differences. *Frontiers in Computational Neuroscience* 2018;  
839 12:1–8. DOI: 10.3389/fncom.2018.00053
- 840 54. Hove MJ, Marie C, Bruce IC, and Trainor LJ. Superior time perception for lower musical pitch explains  
841 why bass-ranged instruments lay down musical rhythms. *Proceedings of the National Academy of  
842 Sciences of the United States of America* 2014; 111:10383–8. DOI: 10.1073/pnas.1402039111
- 843 55. Lenc T, Keller PE, Varlet M, and Nozaradan S. Neural tracking of the musical beat is enhanced by  
844 low-frequency sounds. *Proceedings of the National Academy of Sciences of the United States of America*  
845 2018; 115:8221–6. DOI: 10.1073/pnas.1801421115
- 846 56. Repp BH. Phase Correction , Phase Resetting , and Phase Shifts After Subliminal Timing Perturba-  
847 tions in Sensorimotor Synchronization. *Journal of Experimental Psychology: Human Perception and  
848 Performance* 2001; 27:600–21. DOI: 10.1037//0096-1523.27.3.600
- 849 57. Heggli OA, Cabral J, Konvalinka I, Vuust P, and Kringelbach ML. A Kuramoto model of self-other  
850 integration across interpersonal synchronization strategies. *PLoS Computational Biology* 2019; 15:1–  
851 17. DOI: 10.1371/journal.pcbi.1007422
- 852 58. Koban L, Ramamoorthy A, and Konvalinka I. Why do we fall into sync with others? Interpersonal  
853 synchronization and the brain’s optimization principle. *Social Neuroscience* 2019; 14:1–9
- 854 59. Rimmele JM, Morillon B, Poeppel D, and Arnal LH. Proactive Sensing of Periodic and Aperiodic  
855 Auditory Patterns. *Trends in Cognitive Sciences* 2018; 22:870–82. DOI: 10.1016/j.tics.2018.08.003.  
856 Available from: <https://doi.org/10.1016/j.tics.2018.08.003>
- 857 60. Rohrmeier M. Towards a formalization of musical rhythm. *Proc. of the 21st Int. Society for Music  
858 Information Retrieval Conf.* 2020
- 859 61. Pearce MT. The construction and evaluation of statistical models of melodic structure in music per-  
860 ception and composition. PhD thesis. City University, London, 2005

- 861 62. Sioros G, Davies ME, and Guedes C. A generative model for the characterization of musical rhythms.  
862 Journal of New Music Research 2018; 47:114–28. DOI: 10.1080/09298215.2017.1409769. Available  
863 from: <http://doi.org/10.1080/09298215.2017.1409769>
- 864 63. Repp BH. Obligatory "expectations" of expressive timing induced by perception of musical structure.  
865 Psychological Research 1998; 61:33–43. DOI: 10.1007/s004260050011
- 866 64. Repp BH. Compensation for subliminal timing perturbations in perceptual-motor synchronization.  
867 Psychological Research 2000; 63:106–28. DOI: 10.1007/PL00008170
- 868 65. Schwartz M and Kotz SA. The Timing of Regular Sequences: Production, Perception, and Covariation.  
869 Journal of Cognitive Neuroscience 2015; 27:139. DOI: 10.1162/jocn. Available from: <https://www.apa.org/ptsd-guideline/ptsd.pdf> %7B%5C%%7D0Ahttps://www.apa.org/about/offices/  
870 directorates/guidelines/ptsd.pdf
- 871
- 872 66. Chauvigné LaS, Gitau KM, and Brown S. The neural basis of audiomotor entrainment: an ALE meta-  
873 analysis. Frontiers in human neuroscience 2014 Jan; 8:776. DOI: 10.3389/fnhum.2014.00776.  
874 Available from: <http://www.pubmedcentral.nih.gov/articlerender.fcgi?artid=4179708%7B%5C%%7Dtool=pmcentrez%7B%5C%%7Drendertype=abstract>
- 875
- 876 67. Kneissler J, Drugowitsch J, Friston K, and Butz MV. Simultaneous learning and filtering without delu-  
877 sions: A bayes-optimal combination of predictive inference and adaptive filtering. Frontiers in Computa-  
878 tional Neuroscience 2015; 9:1–12. DOI: 10.3389/fncom.2015.00047
- 879 68. Weij B van der, Pearce MT, and Honing H. A probabilistic model of meter perception: Simulating  
880 enculturation. Frontiers in Psychology 2017; 8:1–18. DOI: 10.3389/fpsyg.2017.00824
- 881 69. Alejandro M, Id M, Sigman M, and Slezak DF. From beat tracking to beat expectation : Cognitive-  
882 based beat tracking for capturing pulse clarity through time. PLoS ONE 2020; 15:e0242207. DOI:  
883 10.17605/OSF.IO/P3QTV
- 884 70. Large EW, Almonte FV, and Velasco MJ. A canonical model for gradient frequency neural networks.  
885 Physica D: Nonlinear Phenomena 2010; 239:905–11. DOI: 10.1016/j.physd.2009.11.015. Available  
886 from: <http://dx.doi.org/10.1016/j.physd.2009.11.015>
- 887 71. Pouget A, Beck JM, Ma WJ, and Latham PE. Probabilistic brains: Knowns and unknowns. Nature  
888 Neuroscience 2013; 16:1170–8. DOI: 10.1038/nn.3495
- 889 72. Gershman SJ and Uchida N. Believing in dopamine. Nature Reviews Neuroscience 2019; 20:703–14. DOI:  
890 10.1038/s41583-019-0220-7. Available from: <http://dx.doi.org/10.1038/s41583-019-0220-7>

- 891 73. Sarno S, De Lafuente V, Romo R, and Parga N. Dopamine reward prediction error signal codes the  
892 temporal evaluation of a perceptual decision report. *Proceedings of the National Academy of Sciences*  
893 of the United States of America 2017; 114:E10494–E10503. DOI: 10.1073/pnas.1712479114
- 894 74. Tomassini A, Ruge D, Galea JM, Penny W, and Bestmann S. The Role of Dopamine in Temporal Un-  
895 certainty. *Journal of Cognitive Neuroscience* 2016. DOI: 10.1162/jocn. arXiv: 1511.04103. Available  
896 from: [http://dx.doi.org/10.1162/jocn%7B%5C\\_%7Da%7B%5C\\_%7D00409%7B%5C%7D5Cnhttp://www.mitpressjournals.org/doi/abs/10.1162/jocn%7B%5C\\_%7Da%7B%5C\\_%7D00409](http://dx.doi.org/10.1162/jocn%7B%5C_%7Da%7B%5C_%7D00409%7B%5C%7D5Cnhttp://www.mitpressjournals.org/doi/abs/10.1162/jocn%7B%5C_%7Da%7B%5C_%7D00409)  
897 [http://www.mitpressjournals.org/doi/abs/10.1162/jocn%7B%5C\\_%7Da%7B%5C\\_%7D00409](http://www.mitpressjournals.org/doi/abs/10.1162/jocn%7B%5C_%7Da%7B%5C_%7D00409)
- 898 75. Friston KJ, Shiner T, FitzGerald T, Galea JM, Adams R, Brown H, Dolan RJ, Moran R, Stephan KE,  
899 and Bestmann S. Dopamine, affordance and active inference. *PLoS Computational Biology* 2012; 8.  
900 DOI: 10.1371/journal.pcbi.1002327
- 901 76. Cannon J and Patel AD. How beat perception coopts motor neurophysiology: a proposal. *bioRxiv* 2020.  
902 DOI: <https://doi.org/10.1101/805838>
- 903 77. Wang J, Narain D, Hosseini EA, and Jazayeri M. Flexible timing by temporal scaling of cortical  
904 responses. *Nature Neuroscience* 2018; 21:102–12. DOI: 10.1038/s41593-017-0028-6. Available from:  
905 <http://dx.doi.org/10.1038/s41593-017-0028-6>
- 906 78. Gámez J, Mendoza G, Prado L, Betancourt A, and Merchant H. The amplitude in periodic neural state  
907 trajectories underlies the tempo of rhythmic tapping. *PLoS biology* 2019; 17:e3000054
- 908 79. Russo AA, Khajeh R, Bittner SR, Perkins SM, Cunningham JP, Abbott LF, and Churchland MM.  
909 Neural trajectories in the supplementary motor area and primary motor cortex exhibit distinct ge-  
910 ometries, compatible with different classes of computation. *Neuron* 2020; 107. DOI: 10.1101/650002.  
911 Available from: <https://www.biorxiv.org/content/10.1101/650002v1.abstract>
- 912 80. Patel AD and Iversen JR. The evolutionary neuroscience of musical beat perception: the Action Sim-  
913 ulation for Auditory Prediction (ASAP) hypothesis. *Frontiers in Systems Neuroscience* 2014; 8:1–14.  
914 DOI: 10.3389/fnsys.2014.00057. Available from: [http://journal.frontiersin.org/article/10.](http://journal.frontiersin.org/article/10.3389/fnsys.2014.00057/abstract)  
915 [3389/fnsys.2014.00057/abstract](http://journal.frontiersin.org/article/10.3389/fnsys.2014.00057/abstract)
- 916 81. Friston K. Hierarchical models in the brain. *PLoS Computational Biology* 2008; 4. DOI: 10.1371/  
917 [journal.pcbi.1000211](http://journal.pcbi.1000211)
- 918 82. Schubotz RI. Prediction of external events with our motor system: towards a new framework. *Trends*  
919 *in Cognitive Sciences* 2007; 11:211–8. DOI: 10.1016/j.tics.2007.02.006

- 920 83. Rauschecker JP. An expanded role for the dorsal auditory pathway in sensorimotor control and inte-  
921 gration. *Hearing Research* 2011; 271:16–25. DOI: 10.1016/j.heares.2010.09.001. Available from:  
922 <http://dx.doi.org/10.1016/j.heares.2010.09.001>
- 923 84. Kanai R, Komura Y, Shipp S, and Friston K. Cerebral hierarchies: Predictive processing, precision and  
924 the pulvinar. *Philosophical Transactions of the Royal Society B: Biological Sciences* 2015; 370. DOI:  
925 10.1098/rstb.2014.0169
- 926 85. Schroeder CE and Lakatos P. Low-frequency neuronal oscillations as instruments of sensory selection.  
927 *Trends in neurosciences* 2009; 32. DOI: 10.1016/j.tins.2008.09.012.Low-frequency
- 928 86. Arnal LH and Giraud AL. Cortical oscillations and sensory predictions. *Trends in Cognitive Sciences*  
929 2012; 16:390–8. DOI: 10.1016/j.tics.2012.05.003. Available from: [http://dx.doi.org/10.1016/](http://dx.doi.org/10.1016/j.tics.2012.05.003)  
930 [j.tics.2012.05.003](http://dx.doi.org/10.1016/j.tics.2012.05.003)
- 931 87. Arnal LH and Kleinschmidt AK. Entrained delta oscillations reflect the subjective tracking of time.  
932 *Cerebral Cortex* 2017 ;e1349583. DOI: 10.1093/cercor/bhu103
- 933 88. Schwartze M, Farrugia N, and Kotz SA. Dissociation of formal and temporal predictability in early  
934 auditory evoked potentials. *Neuropsychologia* 2013; 51:320–5. DOI: 10.1016/j.neuropsychologia.  
935 2012.09.037. Available from: <http://dx.doi.org/10.1016/j.neuropsychologia.2012.09.037>
- 936 89. Ungan P, Karsilar H, and Yagcioglu S. Pre-attentive Mismatch Response and Involuntary Attention  
937 Switching to a Deviance in an Earlier-Than-Usual Auditory Stimulus: An ERP Study. *Frontiers in*  
938 *Human Neuroscience* 2019; 13:1–16. DOI: 10.3389/fnhum.2019.00058
- 939 90. Todorovic A, Ede F van, Maris E, and Lange FP de. Prior expectation mediates neural adaptation to  
940 repeated sounds in the auditory cortex: An MEG study. *Journal of Neuroscience* 2011; 31:9118–23.  
941 DOI: 10.1523/JNEUROSCI.1425-11.2011
- 942 91. Bastos AM, Usrey WM, Adams Ra, Mangun GR, Fries P, and Friston KJ. Canonical microcircuits for  
943 predictive coding. *Neuron* 2012 Nov; 76:695–711. DOI: 10.1016/j.neuron.2012.10.038. Available  
944 from: [http://www.pubmedcentral.nih.gov/articlerender.fcgi?artid=3777738%7B%5C%7Dtool=](http://www.pubmedcentral.nih.gov/articlerender.fcgi?artid=3777738%7B%5C%7Dtool=pmcentrez%7B%5C%7Drendertype=abstract)  
945 [pmcentrez%7B%5C%7Drendertype=abstract](http://www.pubmedcentral.nih.gov/articlerender.fcgi?artid=3777738%7B%5C%7Dtool=pmcentrez%7B%5C%7Drendertype=abstract)
- 946 92. Herbst SK, Fiedler L, and Obleser J. Tracking temporal hazard in the human electroencephalogram  
947 using a forward encoding model. *eNeuro* 2018; 5:1–17. DOI: 10.1523/ENEURO.0017-18.2018
- 948 93. Tavano A, Schröger E, and Kotz SA. Beta power encodes contextual estimates of temporal event  
949 probability in the human brain. *PLoS ONE* 2019; 14. DOI: 10.1371/journal.pone.0222420

- 950 94. Merchant H and Honing H. Are non-human primates capable of rhythmic entrainment? Evidence for  
951 the gradual audiomotor evolution hypothesis. *Frontiers in neuroscience* 2014 Jan; 7:274. DOI: 10.  
952 3389/fnins.2013.00274. Available from: [http://www.pubmedcentral.nih.gov/articlerender.  
953 fcgi?artid=3894452&tool=pmcentrez&drendertype=abstract](http://www.pubmedcentral.nih.gov/articlerender.fcgi?artid=3894452&tool=pmcentrez&drendertype=abstract)
- 954 95. Harel Y, Meir R, and Oppen M. A tractable approximation to optimal point process filtering: Applica-  
955 tion to neural encoding. *Advances in Neural Information Processing Systems* 2015; 2015-Janua:1603–  
956 11
- 957 96. Snyder DL and Fishman P. How to track a swarm of fireflies by observing their flashes. *IEEE Trans-*  
958 *actions on Information Theory* 1975; 21
